# Supplementary material for: Identification of chromosomal alpha-proteobacterial small RNAs by comparative genome analysis and detection in Sinorhizobium meliloti strain 1021
Source: PubMed Central journal article supplement (PMC2245857; doi:10.1186/1471-2164-8-467), 2007-12-19
Supplement: 1471-2164-8-467-S1.pdf [file 1471-2164-8-467-S1.pdf]

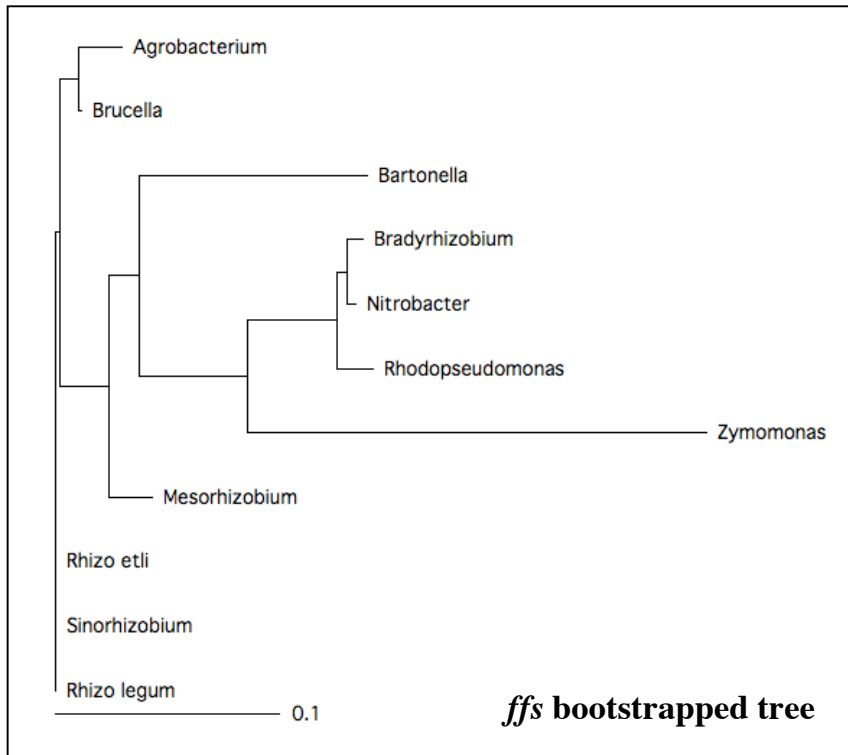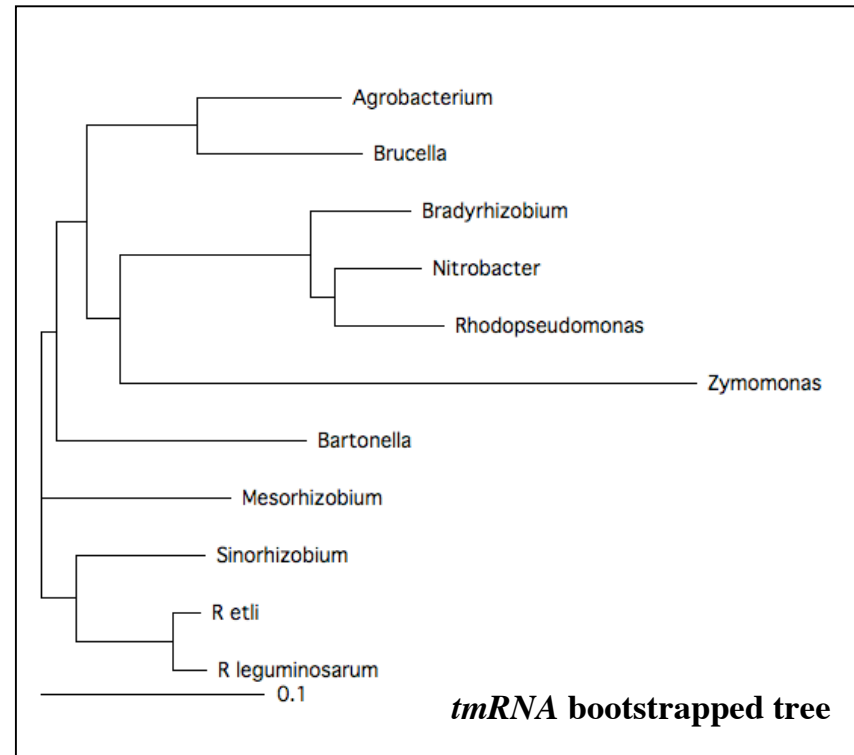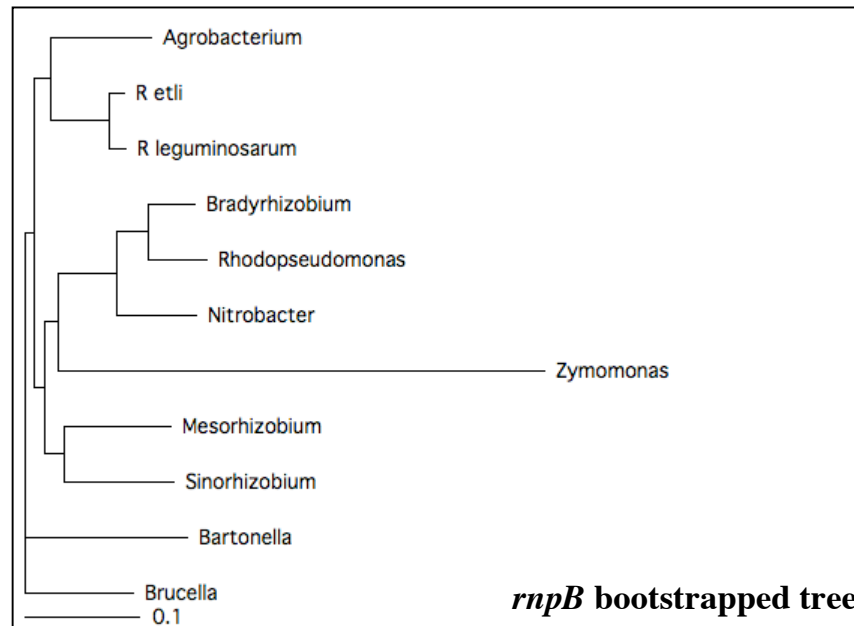

Phylogenetic maximum likelihood trees based on *ffs*, *rnpB* and *tmRNA* in the subgroup-2 alphaproteobacteria.

These unrooted tree derived from the comparison of the complete predicted sequences of *ffs*, *tmRNA* and *rnpB* small RNAs [ref] from closely related alpha-proteobacteria. The analysis used Neighbour joining method. Bootstrap values (1000).
