# Supplementary material for: Identification of chromosomal alpha-proteobacterial small RNAs by comparative genome analysis and detection in Sinorhizobium meliloti strain 1021
Source: PubMed Central journal article supplement (PMC2245857; doi:10.1186/1471-2164-8-467), 2007-12-19
Supplement: 1471-2164-8-467-S2.pdf [file 1471-2164-8-467-S2.pdf]

| Gene in <i>E. coli</i>        | Hit in <i>S. meliloti</i> (e-value < 1)                   | Phylogenic repartition                                                              |
|-------------------------------|-----------------------------------------------------------|-------------------------------------------------------------------------------------|
| <b><u>RNA genes</u></b>       |                                                           |                                                                                     |
| 4.5S-ffs                      | e = 0.74 , Score = 141                                    | ubiquitous                                                                          |
| rnpB                          | e = 2.2e <sup>-08</sup> , Score = 302                     | ubiquitous                                                                          |
| 6S-ssr                        | no significant hit                                        | ubiquitous                                                                          |
| tmRNA                         | no significant hit                                        | ubiquitous                                                                          |
| <b><u>small RNA genes</u></b> |                                                           |                                                                                     |
| QUAD                          | no significant hit                                        | <i>Shigella, E. coli, Salmonella</i>                                                |
| SraE_RygA_RygB                | no significant hit                                        | <i>Shigella, E. coli, Salmonella, Yersinia</i>                                      |
| DicF                          | no significant hit                                        | <i>Shigella, E. coli, Salmonella, Bacillus</i>                                      |
| SgrS                          | no significant hit                                        | <i>Shigella, E. coli, Salmonella</i>                                                |
| RydC                          | no significant hit                                        |                                                                                     |
| sroH                          | hit in ORF ( <i>sma02053-mocE</i> ) e = 0.29, Score = 136 | <i>Escherichia coli</i>                                                             |
| sroE/D/C                      | no significant hit                                        | <i>Shigella, E. coli, Salmonella</i>                                                |
| sroB                          | no significant hit                                        | <i>Shigella, E. coli, Salmonella, Yersinia</i>                                      |
| tke1                          | no significant hit                                        | <i>Shigella, E. coli, Salmonella, Yersinia</i>                                      |
| t44                           | no significant hit                                        | <i>Shigella, E. coli, Salmonella, Yersinia, Photorhabdus, Pseudomonas, Coxiella</i> |
| ryfA                          | no significant hit                                        | <i>Shigella, E. coli, Salmonella</i>                                                |
| IS128                         | no significant hit                                        | <i>Shigella flexneri, Escherichia coli</i>                                          |
| IS102                         | no significant hit                                        | <i>Shigella flexneri, Escherichia coli</i>                                          |
| GadY                          | no significant hit                                        | <i>Shigella flexneri, Escherichia coli</i>                                          |
| MicC                          | no significant hit                                        | <i>Shigella, E. coli, Salmonella, Clostridium</i>                                   |
| C0343                         | no significant hit                                        | <i>Shigella, E. coli, Salmonella</i>                                                |
| C0299                         | no significant hit                                        | <i>Shigella flexneri, Escherichia coli</i>                                          |
| rydB                          | no significant hit                                        | <i>Shigella, E. coli, Salmonella</i>                                                |
| C0719                         | no significant hit                                        | <i>Shigella flexneri, Escherichia coli</i>                                          |
| C0465                         | no significant hit                                        | <i>Shigella flexneri, Escherichia coli</i>                                          |
| IS061                         | no significant hit                                        | <i>Shigella flexneri, Escherichia coli</i>                                          |

|           |                    |                                                                                                                                              |
|-----------|--------------------|----------------------------------------------------------------------------------------------------------------------------------------------|
| RyeE/B    | no significant hit | <i>Shigella, E. coli, Salmonella, Yersinia, Erwinia, Photorhabdus</i>                                                                        |
| RybB      | no significant hit | <i>Shigella, E. coli, Salmonella, Yersinia, Erwinia, Photorhabdus</i>                                                                        |
| SraC_RyeA | no significant hit | <i>Shigella, E. coli, Salmonella, Yersinia, Erwinia, Photorhabdus</i>                                                                        |
| CsrC      | no significant hit | <i>Shigella, E. coli, Salmonella, Yersinia</i>                                                                                               |
| SraJ      | no significant hit | <i>Shigella, E. coli, Salmonella, Yersinia, Photorhabdus</i>                                                                                 |
| SraG/H    | no significant hit | <i>Shigella, E. coli, Salmonella, Yersinia, Erwinia, Photorhabdus</i>                                                                        |
| SraD      | no significant hit | <i>Shigella, E. coli, Salmonella, Yersinia, Erwinia, Serratia</i>                                                                            |
| SraB      | no significant hit | <i>Shigella, E. coli, Salmonella</i>                                                                                                         |
| RyhB      | no significant hit | <i>Shigella, E. coli, Salmonella, Yersinia, Erwinia, Photorhabdus</i><br><i>Photobacterium, Pectobacterium, Vibrio</i>                       |
| Rne5      | no significant hit | <i>Shigella, E. coli, Salmonella, Yersinia, Erwinia</i>                                                                                      |
| OxyS      | no significant hit | <i>Shigella, E. coli, Salmonella</i>                                                                                                         |
| MicF      | no significant hit |                                                                                                                                              |
| GcvB      | no significant hit | <i>Shigella, E. coli, Salmonella, Yersinia, Erwinia, Photorhabdus</i><br><i>Photobacterium, Haemophilus, Vibrio, Pasteurella, Mannheimia</i> |
| Spot_42   | no significant hit | <i>Shigella, E. coli, Salmonella, Yersinia, Vibrio, Photorhabdus, Erwinia</i>                                                                |
| CsrB      | no significant hit | <i>Shigella, E. coli, Salmonella, Yersinia, Erwinia, Photorhabdus</i><br><i>Photobacterium, Pectobacterium, Vibrio, Aeromonas</i>            |
| DsrA      | no significant hit | <i>Shigella, E. coli, Salmonella, Klebsiella</i>                                                                                             |
| RprA      | no significant hit | <i>Shigella, E. coli, Salmonella, Photorhabdus, Erwinia, Yersinia</i>                                                                        |
