# Supplementary material for: Identification of chromosomal alpha-proteobacterial small RNAs by comparative genome analysis and detection in Sinorhizobium meliloti strain 1021
Source: PubMed Central journal article supplement (PMC2245857; doi:10.1186/1471-2164-8-467), 2007-12-19
Supplement: 1471-2164-8-467-S3.pdf [file 1471-2164-8-467-S3.pdf]

| COMPARISON WITH AGROBACTERIUM  |                                             |                 |                 |             |                 |                                           |            |             |                        |
|--------------------------------|---------------------------------------------|-----------------|-----------------|-------------|-----------------|-------------------------------------------|------------|-------------|------------------------|
| Number                         | Upstream ORF Name/Function                  | Dist. to Up_ORF | sRNA location   | sRNA length | Dist. to Dn_ORF | Downstream ORF Name/Function              | BLASTscore | BLASTexpect | Comment                |
| Pred1                          | SMc01933/Hypothetical                       | 181             | 1398286-1398645 | 359         | 169             | SMc01934/prolyl-tRNA synthetase           | 719        | 4.1e-25     | <b>small RNA</b>       |
| Pred2                          | SMc01431/acetolactate synthase 3            | 61              | 2276591-2276747 | 156         | 129             | SMc01432/Hypothetical                     | 585        | 9.5e-19     | <i>ilvI</i> 5'UTR      |
| Pred3                          | SMc02725/Anthranilate synthetase            | 53              | 2575840-2575986 | 146         | 73              | SMc02726/Iron transport                   | 303        | 6.6e-06     | <i>trpE</i> 5' UTR     |
| Pred4                          | SMc02217/O-succinylhomoserine sulfhydrylase | 28              | 580096-580261   | 165         | <b>3</b>        | SMc02218/2'-deoxycytidine 5'-triphosphate | 577        | 3.8e-18     | <i>metZ</i> 5' UTR     |
| Pred5                          | SMc01283/50S ribosomal protein L17          | 28              | 1493333-1493770 | 437         | <b>0</b>        | SMc01282/Hypothetical                     | 507        | 1.1e-22     | <i>5'-3' UTR/ Sm-4</i> |
| Pred6                          | SMc03100/Hypothetical                       | 49              | 3243325-3243519 | 194         | 20              | SMc03099/Adenylate cyclase                | 434        | 6,00E-12    | <i>repeat Sm-4</i>     |
| Pred7                          | SMc01333/peptide chain release factor 2     | 88              | 1450536-1450928 | 392         | 18              | SMc01332//Hypothetical                    | 296        | 7.4e-06     | <i>repeat Sm-1</i>     |
| COMPARISON WITH RHIZOBIUM ETLI |                                             |                 |                 |             |                 |                                           |            |             |                        |
| Pred8                          | SMc02050/trigger factor                     | 37              | 1670130-1670375 | 245         | 3               | SMc02049/glycine dehydrogenase            | 324        | 1.1e-06     | <i>RIME</i>            |
| Pred9                          | SMc02050/trigger factor                     | 17              | 1670110-1670314 | 204         | 64              | SMc02049/glycine dehydrogenase            | 324        | 1.1e-06     | <i>RIME</i>            |
| Pred10                         | SMc01722/GTP-binding protein                | 212             | 480343-480473   | 130         | 8               | SMc01721/putative inner membrane          | 321        | 1.4e-06     | <i>repeat Sm-5</i>     |
| Pred1                          | SMc01933//Hypothetical                      | 181             | 1398286-1398738 | 452         | 76              | SMc01934/prolyl-tRNA synthetase           | 997        | 1.8e-37     | <b>small RNA</b>       |
| Pred2                          | SMc01431/acetolactate synthase 3            | 61              | 2276591-2276814 | 223         | 62              | SMc01432/Hypothetical                     | 468        | 2.8e-13     | <i>ilvI</i> 5'UTR      |
| Pred3                          | SMc02725/Anthranilate synthetase            | 53              | 2575840-2575986 | 146         | 73              | SMc02726/Iron transport                   | 369        | 1.1e-08     | <i>trpE</i> 5' UTR     |
| Pred4                          | SMc02217/O-succinylhomoserine sulfhydrylase | 28              | 580096-580263   | 167         | <b>1</b>        | SMc02218/2'-deoxycytidine 5'-triphosphate | 650        | 3,00E-21    | <i>metZ</i> 5' UTR     |
| Pred5                          | SMc01283/50S ribosomal protein L17          | 28              | 1493333-1493769 | 436         | <b>1</b>        | SMc01282/Hypothetical                     | 303        | 3.7e-09     | <i>5'-3' UTR/ Sm-4</i> |
| Pred6                          | SMc03100/Hypothetical                       | 49              | 3243325-3243473 | 148         | 66              | SMc03099/Adenylate cyclase                | 307        | 6.9e-06     | <i>repeat Sm-4</i>     |
| Pred11                         | SMc02503/Hypothetical                       | 26              | 3290285-3290536 | 251         | 78              | SMc02502/ATP synthase                     | 265        | 7.4e-08     | <i>RIME</i>            |
| Pred12                         | SMc02910/transport                          | 103             | 267022-267105   | 83          | 35              | SMc02911/Hypothetical                     | 309        | 6.7e-06     | <i>smc02911-5'UTR</i>  |
| Pred13                         | SMc00018/ribonuclease H                     | 33              | 1001412-1001580 | 168         | 8               | SMc00072/eroxiredoxin                     | 265        | 3.8e-08     | <i>RIME</i>            |
| Pred7                          | SMc01333/peptide chain release factor 2     | 88              | 1450536-1450945 | 409         | <b>1</b>        | SMc01332/Hypothetical                     | 307        | 7,00E-16    | <i>repeat Sm-1</i>     |
