# Supplementary material for: Identification of chromosomal alpha-proteobacterial small RNAs by comparative genome analysis and detection in Sinorhizobium meliloti strain 1021
Source: PubMed Central journal article supplement (PMC2245857; doi:10.1186/1471-2164-8-467), 2007-12-19
Supplement: 1471-2164-8-467-S5.pdf [file 1471-2164-8-467-S5.pdf]

| ID                    | Latence | Early-Exponential | Mid-Exponential | Late-Exponential | Statio |
|-----------------------|---------|-------------------|-----------------|------------------|--------|
| 5S                    | 2.4     | 10.76             | 2.80            | 2.87             | 3.85   |
| sra05( <i>4.5S</i> )  | 12.4    | 16.14             | 7.02            | 2.25             | 26.31  |
| sra49( <i>tmRNA</i> ) | 6.9     | 14.71             | 19.23           | 1.99             | 12.55  |
| sra50( <i>rnpB</i> )  | 24.3    | 28.70             | 57.29           | 52.77            | 52.02  |
| sra01( <i>oriC</i> )  | 1.4     | 1.47              | 1.32            | 1.16             | 1.09   |
| sra02                 | 1.2     | 1.09              | 1.45            | 1.09             | 1.24   |
| sra03                 | 4.2     | 1.85              | 4.09            | 5.38             | 3.26   |
| sra04                 | 3.0     | 2.53              | 3.16            | 1.57             | 1.78   |
| sra06                 | 1.6     | 1.08              | 1.28            | 1.10             | 0.94   |
| sra07                 | 1.2     | 1.16              | 1.09            | 0.89             | 1.05   |
| sra08                 | 1.1     | 1.13              | 1.03            | 1.11             | 0.88   |
| sra09                 | 1.4     | 0.96              | 1.39            | 1.18             | 1.29   |
| sra10A                | 5.5     | 2.61              | 4.83            | 2.65             | 1.97   |
| sra10B                | 3.8     | 1.44              | 4.33            | 2.11             | 2.07   |
| sra11                 | 1.5     | 1.40              | 1.49            | 1.48             | 1.20   |
| sra12-A               | 1.5     | 1.02              | 1.49            | 1.22             | 1.50   |
| sra12-B               | 5.0     | 4.33              | 3.33            | 3.21             | 4.56   |
| sra13                 | 0.9     | 1.02              | 1.01            | 0.80             | 1.00   |
| sra14-A               | 9.0     | 2.84              | 8.67            | 4.14             | 3.73   |
| sra14-B               | 12.5    | 6.32              | 10.62           | 5.89             | 3.73   |
| sra15                 | 4.9     | 2.32              | 3.46            | 6.33             | 3.45   |
| sra16                 | 1.9     | 1.39              | 2.50            | 3.16             | 1.83   |
| sra17                 | 2.6     | 1.98              | 2.55            | 1.88             | 1.69   |
| sra18                 | 1.8     | 1.26              | 2.19            | 1.41             | 1.13   |
| sra19                 | 1.0     | 1.26              | 1.12            | 0.92             | 1.58   |
| sra20                 | 1.3     | 1.28              | 1.17            | 1.10             | 0.93   |
| sra21                 | 1.6     | 1.47              | 1.84            | 1.28             | 1.11   |
| sra22-A               | 1.2     | 0.92              | 1.16            | 1.35             | 0.95   |
| sra22-B               | 1.9     | 1.01              | 1.09            | 1.00             | 1.15   |
| sra23                 | 1.1     | 1.27              | 1.01            | 1.03             | 0.88   |
| sra24                 | 1.2     | 1.11              | 1.38            | 1.32             | 0.96   |
| sra25                 | 1.5     | 1.32              | 2.09            | 1.45             | 1.57   |
| sra26                 | 2.0     | 1.24              | 1.84            | 1.91             | 1.76   |
| sra27                 | 1.1     | 1.08              | 1.17            | 1.08             | 0.89   |
| sra28-A               | 5.8     | 2.86              | 7.39            | 3.72             | 3.04   |
| sra28-B               | 3.9     | 2.32              | 3.50            | 2.94             | 2.06   |
| sra29                 | 3.6     | 1.10              | 2.22            | 1.24             | 1.65   |
| sra30                 | 1.6     | 1.21              | 1.89            | 1.44             | 1.25   |
| sra31                 | 1.1     | 1.11              | 1.13            | 1.22             | 1.12   |
| sra32-A               | 3.5     | 5.25              | 12.02           | 1.86             | 2.27   |
| sra32-B               | 1.6     | 1.16              | 1.63            | 1.02             | 1.09   |
| sra33                 | 2.3     | 16.16             | 2.29            | 2.50             | 2.49   |
| sra34                 | 1.3     | 1.18              | 1.28            | 1.21             | 1.42   |
| sra35                 | 15.0    | 2.91              | 14.41           | 2.08             | 3.41   |
| sra36                 | 2.4     | 3.43              | 2.17            | 1.43             | 2.17   |
| sra37                 | 1.7     | 1.28              | 1.70            | 1.15             | 1.08   |
| sra38A                | 1.4     | 1.08              | 1.53            | 1.25             | 1.47   |

|         |      |       |       |       |       |
|---------|------|-------|-------|-------|-------|
| sra38D  | 1.8  | 1.17  | 1.53  | 1.44  | 2.03  |
| sra39A  | 5.1  | 19.35 | 20.80 | 5.09  | 6.03  |
| sra39B  | 3.4  | 3.40  | 2.05  | 1.72  | 4.82  |
| sra40A  | 1.6  | 1.00  | 1.53  | 1.63  | 1.23  |
| sra40B  | 1.5  | 1.43  | 1.90  | 1.66  | 1.21  |
| sra41   | 7.5  | 3.89  | 9.13  | 6.98  | 7.22  |
| sra42   | 2.1  | 1.25  | 2.17  | 1.57  | 1.25  |
| sra43-A | 3.1  | 1.67  | 2.52  | 3.23  | 2.19  |
| sra43-B | 3.8  | 2.21  | 2.52  | 2.04  | 3.11  |
| sra44   | 1.2  | 1.23  | 1.28  | 1.16  | 1.31  |
| sra45   | 3.7  | 3.72  | 3.13  | 2.03  | 1.87  |
| sra46   | 1.5  | 1.11  | 1.61  | 1.14  | 0.97  |
| sra47-A | 6.3  | 3.16  | 7.35  | 3.30  | 3.66  |
| sra47-B | 10.8 | 12.50 | 16.01 | 4.45  | 5.82  |
| sra48   | 4.3  | 1.85  | 3.79  | 1.85  | 2.48  |
| sra49   | 6.9  | 14.71 | 19.23 | 1.99  | 12.55 |
| sra50A  | 4.4  | 2.67  | 5.65  | 3.78  | 3.70  |
| sra50B  | 24.3 | 28.70 | 57.29 | 52.77 | 52.02 |
| sra51A  | 3.6  | 2.19  | 6.56  | 5.88  | 3.14  |
| sra51B  | 3.1  | 2.09  | 2.57  | 1.96  | 1.52  |
| sra52   | 2.1  | 1.33  | 2.17  | 1.57  | 1.26  |
| sra53A  | 3.1  | 2.78  | 3.44  | 2.59  | 1.95  |
| sra53B  | 3.2  | 2.05  | 2.85  | 2.80  | 1.54  |
| sra54   | 2.1  | 1.69  | 2.20  | 1.65  | 1.26  |
| sra55   | 6.1  | 3.06  | 5.65  | 3.78  | 2.26  |
| sra56   | 3.1  | 2.36  | 2.98  | 1.68  | 2.63  |
| sra57   | 1.6  | 1.43  | 1.36  | 1.46  | 1.21  |
| sra58   | 2.4  | 1.37  | 1.81  | 1.62  | 1.49  |
| sra59   | 18.9 | 9.83  | 13.57 | 5.24  | 10.58 |
| sra60A  | 3.4  | 2.92  | 4.15  | 6.98  | 3.75  |
| sra60B  | 5.0  | 2.95  | 4.76  | 2.89  | 2.38  |
| sra61   | 1.8  | 1.17  | 1.58  | 1.24  | 1.22  |
| sra62A  | 26.0 | 24.86 | 49.22 | 18.10 | 27.05 |
| sra62B  | 5.6  | 5.87  | 13.71 | 10.70 | 11.51 |
| sra63A  | 1.6  | 1.82  | 1.68  | 1.96  | 1.57  |
| sra63B  | 1.4  | 1.04  | 1.71  | 1.66  | 2.62  |
| sra63C  | 2.5  | 1.74  | 1.61  | 1.51  | 1.82  |
| sra63D  | 1.2  | 1.17  | 1.15  | 1.28  | 1.40  |
| sra64   | 1.1  | 1.10  | 1.27  | 1.35  | 1.22  |
| sra65A  | 4.3  | 1.09  | 1.37  | 1.21  | 1.16  |
| sra65B  | 1.7  | 1.14  | 1.60  | 1.39  | 1.22  |
| sra66   | 1.2  | 1.22  | 1.88  | 1.45  | 1.40  |
| sra67   | 3.8  | 1.48  | 3.32  | 1.59  | 1.43  |
