# Supplementary material for: Identification of chromosomal alpha-proteobacterial small RNAs by comparative genome analysis and detection in Sinorhizobium meliloti strain 1021
Source: PubMed Central journal article supplement (PMC2245857; doi:10.1186/1471-2164-8-467), 2007-12-19
Supplement: 1471-2164-8-467-S6.pdf [file 1471-2164-8-467-S6.pdf]

| Loci | Organism           | Replicon      | Size (nt) | Coding                                  |
|------|--------------------|---------------|-----------|-----------------------------------------|
| 1    | <i>S. meliloti</i> | chromosome    | 118       | MHLWWLLLPVPPQQLFPSGGFNLYLHNYKGPSFSCGPLF |
| 2    | <i>S. meliloti</i> | chromosome    | 112       | -                                       |
| 3    | <i>S. meliloti</i> | pSymA         | 109       | MRMAVFLPVPLHQLFLSGGSYLQTHGSRFSDGPFL     |
| 1    | <i>A. tum.</i>     | chromosome    | 113       | MHTVAFPPSSTASAVPLWRFLTFTLKGPIWYPAALFF   |
| 2    | <i>A. tum.</i>     | chromosome    | 114       | -                                       |
| 1    | <i>R. etli</i>     | chromosome    | 113       | MHMVAFPPSSTALAVPLWRFLTFTLIRALVFQWPSFF   |
| 2    | <i>R. etli</i>     | chromosome    | 112       | MHMVAFPPSSTALAVPLWRFLTFTLIRALVFQWPSFF   |
| 3    | <i>R. etli</i>     | p42d          | 112       | -                                       |
| 3    | <i>R. etli</i>     | p42a          | 111       | MHMAAFLPVPPQQLFPSGGLTFTLHGPRFPLAHFF     |
| 1    | <i>R. legum.</i>   | chromosome    | 113       | MHMAAFLPVPPQQLFPSGGLTFTLHGPRFPLAHFF     |
| 2    | <i>R. legum.</i>   | chromosome    | 113       | -                                       |
| 3    | <i>R. legum.</i>   | pRL10         | 111       | MMHMAVSSQCRRNSCSPLEVFDLHTSWASVLPTAHFF   |
| 3    | <i>R. legum.</i>   | pRL11         | 111       | MQHGGFPPSSVVS AVPL WRFIPSQLMGHGSPSALFF  |
| 1    | <i>M. loti</i>     | chromosome    | 104       | MHMAAFLPVPPQQLFPSGGLTFTLHGPRFPLAHFF     |
| 2    | <i>M. loti</i>     | pMLA          | 107       | -                                       |
| 3    | <i>M. loti</i>     | pMLA          | 66        | -                                       |
| 1    | <i>B. suis</i>     | chromosome II | 98        | -                                       |
| 2    | <i>B. suis</i>     | chromosome I  | 119       | -                                       |
