# Supplementary material for: Identification of chromosomal alpha-proteobacterial small RNAs by comparative genome analysis and detection in Sinorhizobium meliloti strain 1021
Source: PubMed Central journal article supplement (PMC2245857; doi:10.1186/1471-2164-8-467), 2007-12-19
Supplement: 1471-2164-8-467-S7.pdf [file 1471-2164-8-467-S7.pdf]

| <b>Name</b>                                    | <b>Provider</b>              | <b>Reference Number</b> | <b>ATCC Number</b> |
|------------------------------------------------|------------------------------|-------------------------|--------------------|
| <i>S. meliloti</i>                             | INRA Toulouse, France        | Strain 1021             |                    |
| <i>S. meliloti</i>                             | University of Rennes         | Strain 102F34           |                    |
| <i>S. fredii</i>                               | BCCM <sup>TM</sup> , Belgium | LMG 6217                | ATCC 35423         |
| <i>S. medicae</i>                              | BCCM <sup>TM</sup> , Belgium | LMG 18864               | ATCC 700748        |
| <i>S. saheli</i>                               | BCCM <sup>TM</sup> , Belgium | LMG 7837                | ATCC 51690         |
| <i>S. terangaе</i>                             | BCCM <sup>TM</sup> , Belgium | LMG 7834                | ATCC 700749        |
| <i>R. etli</i>                                 | BCCM <sup>TM</sup> , Belgium | LMG 17827               | ATCC 51251         |
| <i>R. leguminosarum</i> biovar <i>phaseoli</i> | BCCM <sup>TM</sup> , Belgium | LMG 4285                | ATCC 14482         |
| <i>R. leguminosarum</i> biovar <i>trifolii</i> | BCCM <sup>TM</sup> , Belgium | LMG 4255                | ATCC 10140         |
| <i>M. loti</i>                                 | BCCM <sup>TM</sup> , Belgium | LMG 6125                | ATCC 33669         |
| <i>B. japonicum</i>                            | BCCM <sup>TM</sup> , Belgium | LMG 6138                | ATCC 10324         |
| <i>A. tumefaciens</i>                          | Institut Pasteur, France     | CIP 104333              | ATCC 33970         |
