# Supplementary material for: Identification of chromosomal alpha-proteobacterial small RNAs by comparative genome analysis and detection in Sinorhizobium meliloti strain 1021
Source: PubMed Central journal article supplement (PMC2245857; doi:10.1186/1471-2164-8-467), 2007-12-19
Supplement: 1471-2164-8-467-S8.pdf [file 1471-2164-8-467-S8.pdf]

| Name            | Sequence 5' → 3'           | Specific use  |
|-----------------|----------------------------|---------------|
| sra32-5'        | AAACAGGCAGGAAGACCAAA       | RACE          |
| sra32-3'        | GGCCAAAGCCTTGTTTTTAAG      | RACE          |
| sra32NBrhiz     | CGCGCCTAAGATCTTATCCTCCCAAG | Northern Blot |
| 5S              | GACCTACTCTCCCGCGTCTT       | Northern Blot |
| <i>rnpB</i>     | GCTTGCGGAGTAAGGGTGAA       | Northern Blot |
| <i>4.5S-ffs</i> | AGGCTGGCACGATGACC          | Northern Blot |

#### Northern assays (dots and blots)

|        | Strand +              | Strand -              |
|--------|-----------------------|-----------------------|
| sra01  | TCACTTGCCGCTTCCTAATC  | GATTAGGAAGCGGCAAGTGA  |
| sra02  | GTCCGACAAGACATCCCATT  | AATGGGATGTCTTGTCGGAC  |
| sra03  | GTGAGTCTGGTGATTGGCCT  | AGGCCAATCACCAGACTCAC  |
| sra04  | TCATCGGTATATATCGCGCC  | GGCGCGATATATACCGATGA  |
| sra05  | AAGGAAGCAGCCCTAACGAG  | CTCGTTAGGGCTGCTTCCTT  |
| sra06  | ?                     |                       |
| sra07  | AAAGTCAGCCTTTGCGTCAT  | ATGACGCAAAGGCTGACTTT  |
| sra08  | GGGGCTTAACTTGCCTTACC  | GGTAAGGCAAGTTAAGCCCC  |
| sra09  | TTCTTAAACGCTGGAAATGGG | CCCATTTCAGCGTTAAGAA   |
| sra10  | GAGCAGGAAGAAGGAGGCTC  | GAGCCTCCTTCTTCCTGCTC  |
| sra11  | CAGTAGCGAAGGGCATCTTC  | GAAGATGCCCTTCGCTACTG  |
| sra12a | TAGTGTGGCGCGTTACTTTG  | CAAAGTAACGCGCCACACTA  |
| sra12b | GCTGTTCGATTGTACGGGTT  | AACCCGTACAATCGAACAGC  |
| sra13  | TTGTTTAAACGTGGCTGCAAG | CTTGCAGCCACGTAAACAA   |
| sra14  | CGGAGCAGGTGATAAAGCTC  | GAGCTTTATCACCTGCTCCG  |
| sra15  | AATTGAAAATCCGCGTATCG  | CGATACGCGGATTTTCAATT  |
| sra16  | TCGACTTCTCCTCAAGGCAT  | ATGCCTTGAGGAGAAGTCGA  |
| sra17  | GCAACTGATCTGCAACGAAA  | TTTCGTTGCAGATCAGTTGC  |
| sra18  | CACTCTCTCGGCCAAAGAAC  | GTTCTTTGGCCGAGAGAGTG  |
| sra19  | CCTTCTGCTTCTGGGTTGAG  | CTCAACCCAGAAGCAGAAGG  |
| sra20  | CGCACTGAGGTCATTGTTTG  | CAAACAATGACCTCAGTGCG  |
| sra21  | TGCTGCGTAACTTATACGCG  | CGCGTATAAGTTACGCAGCA  |
| sra22  | AGAATTGGGAAGCCGGTC    | GACCGGCTTCCCAATTCT    |
| sra23  | GGAGGTCAAGCTCTGGAATG  | CATTCCAGAGCTTGACCTCC  |
| sra24  | GGGCAGAGGAAGGACTCTCT  | AGAGAGTCCTTCCTCTGCCC  |
| sra25  | GACATGGGAGAGGTGAAGGA  | TCCTTCACCTCTCCCATGTC  |
| sra26  | AATGAATCACAGGGCGATTC  | GAATCGCCCTGTGATTCATT  |
| sra27  | GCGTTTAGTTGAAATCCGGA  | TCCGGATTTCAACTAAACGC  |
| sra28a | GCAACGAACCCAAAACATTT  | AAATGTTTTGGGTTTCGTTGC |
| sra28b | ATCCACGATTGTCATCGACA  | TGTCGATGACAATCGTGGAT  |
| sra29  | AATGCCTTTACATTCCCTCGC | GCGAGGAATGTAAAGGCATT  |
| sra30  | GCAATTTGTGACCACTCGTG  | CACGAGTGGTCACAAATTGC  |
| sra31  | CGACATGCATGATAACGACC  | GGTCGTTATCATGCATGTCG  |
| sra32  | CGCGTGATCTTTAATCCGTT  | AACGGATTAAAGATCACGCG  |
| sra33  | CCCATGATGCTCAGGTCC    | GGACCTGAGCATCATGGG    |
| sra34  | TACCTTCCGGTTCTGACGAC  | GTCGTCAGAACCGGAAGGTA  |
| sra35  | GGGAGGTTTCCGACCTTAAG  | CTTAAGGTCGGAAACCTCCC  |
| sra36  | TGGGTTCTTCAAGAGGATGG  | CCATCCTCTTGAAGAACCCA  |
| sra37  | TAGGGACGAAGGCTAGTCGA  | TCGACTAGCCTTCGTCCCTA  |

|        |                       |                       |
|--------|-----------------------|-----------------------|
| sra38  | AGGAGTGTTGCCAATCCATC  | GATGGATTGGCAACACTCCT  |
| sra39  | TCCTTTGGCCTGAGAGTTTC  | GAAACTCTCAGGCCAAAGGA  |
| sra40  | GTCGCTCAGGTCTATAGCGG  | CCGCTATAGACCTGAGCGAC  |
| sra41  | AGAAAAACTTGGGCCCTTGT  | ACAAGGGCCCAAGTTTTTCT  |
| sra42  | GAGACAATGGCAGAGGCCTA  | TAGGCCTCTGCCATTGTCTC  |
| sra43  | GGCGATTGTTGCAGAGAGAT  | ATCTCTCTGCAACAATCGCC  |
| sra44  | GCACCGCTTATGTAATGGCT  | AGCCATTACATAAGCGGTGC  |
| sra45  | TACTGGCTGACATCGTCGAG  | CTCGACGATGTCAGCCAGTA  |
| sra46a | CTGACTTCGGATCATCCGTT  | AACGGATGATCCGAAGTCAG  |
| sra46b | AGAACGTCCCCTTCACAGC   | GCTGTGAAGGGGACGTTCT   |
| sra47  | CGTAAGCAGTACCGTGTCTGA | TCGACACGGTACTGCTTACG  |
| sra48  | GATGACTGGCTGAGGGGTT   | AACCCCTCAGCCAGTCATC   |
| sra49  | CTGAAGCACGTCTCGCTGC   | GCAGCGAGACGTGCTTCAG   |
| sra50  | CCCACCCTTTCACCCTTACT  | AGTAAGGGTGAAAGGGTGGG  |
| sra51  | TGAATACGCGAGTCAAAACG  | CGTTTTGACTCGCGTATTCA  |
| sra52  | GGAATTCGCATCTTTAGATGG | CCATCTAAAGATGCGAATTCC |
| sra53  | AGGTTCTTTCCTCCAGGGAA  | TTCCCTGGAGGAAAGAACCT  |
| sra54  | TTCCCTCATGTATCGCATGA  | TCATGCGATACATGAGGGAA  |
| sra55  | TGCCATATGTGATAAGCCA   | TGGCTTATCGACATATGGCA  |
| sra56  | AGGGACAGTCCCCTTGAGAT  | ATCTCAAGGGGACTGTCCTT  |
| sra57  | ATTGGCTGAAGGTGTTGAGG  | CCTCAACACCTTCAGCCAAT  |
| sra58  | GTGTATTCTCCCCCTTGTGG  | CCACAAGGGGGGAGAATACAC |
| sra59  | TGTGCCTCTTCAGTAACCCC  | GGGGTTACTGAAGAGGCACA  |
| sra60  | ATTATCGCGAAGGTAATGCG  | ATTATCGCGAAGGTAATGCG  |
| sra61  | TTGTACTGTGCAGGTGAGGC  | GCCTCACCTGCACAGTACAA  |
| sra62  | CAACTTCCGGTGCTCTTCTC  | GAGAAGAGCACCGGAAGTTG  |
| sra63a | GCAAGTAACGCCTGAGGAAC  | GTTCCCTCAGGCGTTACTTGC |
| sra63b | GAGGGGTCAATTCCTCGATT  | AATCGAGGAATTGACCCCTC  |
| sra63c | TTCTCAATCGCAATGGACTG  | CAGTCCATTGCGATTGAGAA  |
| sra63d | GAGAGCTGTAACCGCCACTC  | GAGTGGCGGTTACAGCTCTC  |
| sra64  | GAAGCTTGTGCATTTTGCAA  | TTGCAAAATGCACAAGCTTC  |
| sra65a | ATCCGGATCTTCGCTAGGTT  | AACCTAGCGAAGATCCGGAT  |
| sra65b | ATCACGAGGGTGAAGTACC   | GGTCAGTTCACCCTCGTGAT  |
| sra65c | TTTTGCAGGTCTGCAACAAG  | CTTGTTGCAGACCTGCAAAA  |
| sra65d | TCCAGGATATAATCGGCCAG  | CTGGCCGATTATATCCTGGA  |
| sra65d | CTCTTCGAAGGCAAAGGAGA  | TCTCCTTTGCCTTCGAAGAG  |
| sra66  | TGAAGATTGCACACTCGGAG  | CTCCGAGTGTGCAATCTTCA  |
| sra67  | GCAAGGTTCAAAAGCCAGAC  | GTCTGGCTTTTGAACCTTGC  |
