# Supplementary material for: Identification of chromosomal alpha-proteobacterial small RNAs by comparative genome analysis and detection in Sinorhizobium meliloti strain 1021
Source: PubMed Central journal article supplement (PMC2245857; doi:10.1186/1471-2164-8-467), 2007-12-19
Supplement: 1471-2164-8-467-S9.pdf [file 1471-2164-8-467-S9.pdf]

| Name            | Sense              | Sequence (5' -> 3')                            | IGR size | PCR size |
|-----------------|--------------------|------------------------------------------------|----------|----------|
| 5S              | forward<br>reverse | CGACCTGGTGGTTCTGG<br>AGACCTGGCAGCGACCTACT      | 120      | 120      |
| 5Sint           | forward<br>reverse | CGTTCCCATTCGGAACAC<br>GACCTACTCTCCCGCGTCTT     | 120      | 76       |
| sra01           | forward<br>reverse | TATCCAGTCCGCGTCAATCT<br>TGATAAGGCGGGACAAAAAC   | 400      | 293      |
| sra02           | forward<br>reverse | CAAAGGCTCCTGTCAGTTCC<br>ACTTTCAGCCGAATCGTCAA   | 306      | 161      |
| sra03           | forward<br>reverse | GGTCGGCCTATCCTTGAAAT<br>CTCTTTGAAAGCGGGACAAA   | 332      | 160      |
| sra04           | forward<br>reverse | GTCATCCGCAGCACCTTT<br>GCCACCTGTCCATCCTTCT      | 320      | 175      |
| sra05 (4.5S)    | forward<br>reverse | AGGCTTGGCTTGCATTTG<br>CTGCTTCCTTCCGGACCT       | 161      | 101      |
| sra05Bis (4.5S) | forward<br>reverse | GCATTTGCTGCGGATATTG<br>CGACAGGACGGAGAAGGTG     | 161      | 148      |
| sra06           | forward<br>reverse | GTATTGTAAAGGGCGCCACA<br>GGGAGGCTTCAAAGAAAACC   | 227      | 199      |
| sra07           | forward<br>reverse | GGAGGGGCTACTTCTGCC<br>GATGAGGCCCTCCCTAA        | 162      | 138      |
| sra08           | forward<br>reverse | CTTGCCTTACCGTCACCG<br>CACCGCGTCTTCTTCGAC       | 214      | 144      |
| sra09           | forward<br>reverse | GGGCGGCTTTCCTTTTT<br>TCCAGCGTTAAGAACGGC        | 180      | 133      |
| sra10A          | forward<br>reverse | GATTGACCTTGCCACGCT<br>AAAGCCCAAAGTCACCCC       | 448      | 388      |
| sra10B          | forward<br>reverse | CGAGACGATAAAACCGGG<br>TGGCGGCCTCATCTTTA        | 417      | 365      |
| sra11           | forward<br>reverse | ATTACTGCCAGCCAACATC<br>AAGAAATGCCTTCGCTTCA     | 179      | 160      |
| sra12A          | forward<br>reverse | GCTGGCACTAGCAGTCCTTC<br>TCGTCGCGAGACACTTTATG   | 689      | 178      |
| sra12BFAR       | forward<br>reverse | TAGTGTGGCGGTTACTTTG<br>TCGTCGCGAGACACTTTATG    | 689      | 550      |
| sra13           | forward<br>reverse | CGAAACGACCGGTTTGAC<br>CCAACTCCGGGAATTGA        | 137      | 130      |
| sra14A          | forward<br>reverse | CGGAGCAGGTGATAAAGCTC<br>GGGTGTACTIONGGCGTCAGTT | 773      | 230      |
| sra14B          | forward<br>reverse | CAAAGACACGCATTCCATCA<br>CATCCATTGCAAACGGTTA    | 773      | 567      |
| sra15           | forward<br>reverse | AGCTTAGCGGGTGCATCG<br>CACGCGAATGAGGCTGT        | 210      | 150      |
| sra16           | forward<br>reverse | GAATCGCAGACGACACAAGA<br>CCGGAATCGCTAAAATTCAA   | 566      | 216      |
| sra17A          | forward<br>reverse | GTTACTCCGCGTTGTTTGCT<br>TTTCGTTGCAGATCAGTTGC   | 686      | 211      |
| sra17BFAR       | forward<br>reverse | TTTCGTTGCAGATCAGTTGC<br>GGCCTTCCGGGAGTATTG     | 686      | 385      |
| sra17AFBR       | forward            | CGAGTATCAGGACGCGAATC                           | 686      | 456      |

|        |         |                       |      |     |
|--------|---------|-----------------------|------|-----|
|        | reverse | GTTACTCCGCGTTGTTTGCT  |      |     |
| sra18  | forward | CTCTCGGCCAAAGAACCA    | 247  | 190 |
|        | reverse | CGGTAATCTTGCGTGGGA    |      |     |
| sra19  | forward | CCTTCTGCTTCTGGGTTGAG  | 449  | 213 |
|        | reverse | TCGGGGTCTTTCACTTGTCT  |      |     |
| sra20  | forward | CATTAACATTTGCCGGGTG   | 139  | 99  |
|        | reverse | TGCAGCGGATCTGAGACA    |      |     |
| sra21  | forward | AATCACGGCATTGTGATCG   | 234  | 154 |
|        | reverse | GAAAGCATTCCGGACTTCAA  |      |     |
| sra22A | forward | TCGATCAGACCCTTGTGTTG  | 497  | 247 |
|        | reverse | GGCACCTTGAGTGTCCCTCAT |      |     |
| sra22B | forward | TTTCTGGAATCGGATGTCGT  | 497  | 249 |
|        | reverse | TTTCTGCTTCAAGGCTGGTT  |      |     |
| sra23  | forward | CCAGTGAGGTTTCGCCAT    | 179  | 101 |
|        | reverse | AGAGCTTGACCTCCGCCT    |      |     |
| sra24  | forward | TCCCTGCCGATCTAAGAATG  | 446  | 214 |
|        | reverse | AATGCCATTCACCTCCTCAGC |      |     |
| sra25  | forward | CGTCAACGAACAGAAAGGAAG | 277  | 154 |
|        | reverse | ATGAGCTTTGGCCTCACAAT  |      |     |
| sra26  | forward | AACGTTCGATCCCATCTTCAG | 222  | 212 |
|        | reverse | TCAACGCATCAATCCATCTC  |      |     |
| sra27  | forward | TTGAAATCCGGACGTGAAAT  | 444  | 181 |
|        | reverse | CGCTCGTCTTATGGATGTGA  |      |     |
| sra28A | forward | CGAACCCAAAACATTTTCGTC | 907  | 254 |
|        | reverse | TAATAGGTGGGCTCGCTGGT  |      |     |
| sra28B | forward | CGATCGTTCCTCCAACAACCT | 907  | 298 |
|        | reverse | GCCGCCATTATTGTGTTTTT  |      |     |
| sra29  | forward | TGAGAGCCGGCAAGAAAG    | 283  | 198 |
|        | reverse | GACACCAATCCGACGAGG    |      |     |
| sra30  | forward | GACGCGCGGGAACAGTAG    | 164  | 150 |
|        | reverse | ATGATGCGCCGGTTTTGT    |      |     |
| sra31  | forward | ATGCCGCCAAAAGTGT      | 96   | 89  |
|        | reverse | CTGAGGCCTAGGACATAAAGC |      |     |
| sra32A | forward | GAAGTCTTCGCCGTAATGT   | 570  | 195 |
|        | reverse | ATTTTCGGCTCACAAAACAGG |      |     |
| sra32B | forward | TTGGTCTTCCTGCCTGTTTT  | 570  | 249 |
|        | reverse | AGCGTTCATAGCCGCTTC    |      |     |
| sra33  | forward | GCCGGGGTAAGCACATC     | 346  | 245 |
|        | reverse | GGTTGCAGCACGAGGAAT    |      |     |
| sra34  | forward | ACGCTTTTTGAAGCGGTG    | 287  | 197 |
|        | reverse | GTGAAACCTTTGCGCGTT    |      |     |
| sra35  | forward | GCGTAAGCCAATAGGAATGG  | 221  | 207 |
|        | reverse | TCTGCCTTTCACTGCTCCTT  |      |     |
| sra36  | forward | CGCCTCTTTTGACCGTT     | 205  | 172 |
|        | reverse | CGACCCCGTCAATCAAT     |      |     |
| sra37  | forward | CGATTCAGCAACACATTTCC  | 230  | 154 |
|        | reverse | TGACGGCACACAACTCACT   |      |     |
| sra38A | forward | GTTTGAGCCGGGATTACAGA  | 1338 | 217 |
|        | reverse | GCCTCAACGCCATCATCTAT  |      |     |
| sra38D | forward | AATAATGGGCAAGTGGATCG  | 1338 | 449 |

|               |         |                        |     |     |
|---------------|---------|------------------------|-----|-----|
|               | reverse | GCTTGAGGCTCCTTAGCAGA   |     |     |
| sra39A        | forward | GACAAATTCGAGCCCCCT     | 448 | 409 |
|               | reverse | TATGGGCGAAGGACAGGA     |     |     |
| sra39B        | forward | TATCTTCTCCCCGACGGC     | 366 | 310 |
|               | reverse | CATAGCGGCGCAAGAAAT     |     |     |
| sra40A        | forward | ATACGGGAGCTGCACTTGAT   | 908 | 161 |
|               | reverse | CGATTGCCCGCATAGAGTAT   |     |     |
| sra40B        | forward | TTTGTGTACCGTCGGTTGAA   | 908 | 371 |
|               | reverse | GACAGCCCTCTTGCGATG     |     |     |
| sra41         | forward | AGGAAGCGGGCCATAAAC     | 592 | 396 |
|               | reverse | ATGATTGCCGATAGCCCA     |     |     |
| sra42         | forward | AATGGCAGAGGCCTACCC     | 327 | 277 |
|               | reverse | TCTCCAAGAGCGAGGTG      |     |     |
| sra43AFBR     | forward | TACATCTTTCGCCGATTTC    | 765 | 550 |
|               | reverse | CGTTACCTGAGTGAAATATACC |     |     |
| sra43BFAR     | forward | GGAGTTGAGCGATGAACCAG   | 765 | 445 |
|               | reverse | CCAGCCAAGAGCCTTATGAC   |     |     |
| sra44         | forward | CGGCAGCTTGTC AATACG    | 94  | 81  |
|               | reverse | CTTGGCAAATGGGGTGAA     |     |     |
| sra45         | forward | GTAAACCGGCAAAGAAGCAG   | 274 | 164 |
|               | reverse | ACCACCCAATCGCAAAATTA   |     |     |
| sra46         | forward | CGCCTTCCCGAATAGCTT     | 237 | 157 |
|               | reverse | ATATGCCGCCGTCAGGT      |     |     |
| sra47AFBR     | forward | GAAGAATGCTCCGGAATCAA   | 647 | 450 |
|               | reverse | CCTGGGTCACAGTAGCGAAT   |     |     |
| sra47BFAR     | forward | CTTCGCCTGCCTCTTCGT     | 647 | 307 |
|               | reverse | GCGCTAGAGAGTCCTTCGTG   |     |     |
| sra48         | forward | GAATCCACAGGGGCGAC      | 411 | 339 |
|               | reverse | CTCTGGCTGGAACGCCT      |     |     |
| sra49 (tmRNA) | forward | [39]                   |     | 206 |
|               | reverse | [39]                   |     | 206 |
| sra50A        | forward | CCGCACATACTCGCAC       | 377 | 350 |
|               | reverse | GGCAAAGCACGTTTCCTG     |     |     |
| sra50B        | forward | TCTGTATGGCTCCGCCTC     | 377 | 396 |
|               | reverse | CGCCGGTCGTTTAATGAG     |     |     |
| sra51A        | forward | TGAATACGCGAGTCAAACG    | 529 | 250 |
|               | reverse | ATTGAGGAAAGGGTCCTGGT   |     |     |
| sra51B        | forward | TTGAGCCGGCAATATATCCT   | 529 | 281 |
|               | reverse | TTGCGTCTTCTCATTGCTCA   |     |     |
| sra52         | forward | TGATCTCCAACAACCCGAAT   | 273 | 208 |
|               | reverse | TATCGCGTGACAAAACCAA    |     |     |
| sra53A        | forward | AGAAATGAACCACGCCTCAC   | 881 | 334 |
|               | reverse | ATGGCTGACAGAGGACCAAC   |     |     |
| sra53B        | forward | CCTCTGTCAGCCATTGGAGT   | 881 | 324 |
|               | reverse | TTTCCTTATTGCGCGTTTTG   |     |     |
| sra54         | forward | GCATCCCGCTCTAACTCCTT   | 410 | 238 |
|               | reverse | ACTCGTAAATGCGCGAAAGT   |     |     |
| sra55         | forward | CGCACGGTCGTGAGTAAGAT   | 224 | 159 |
|               | reverse | GAGTGCACCTTATCGGCTTC   |     |     |
| sra56         | forward | GTCCGGCCAGGGACAGT      | 224 | 153 |

|          |         |                       |      |     |
|----------|---------|-----------------------|------|-----|
|          | reverse | TGCGATTTTCGCAGAAATTAT |      |     |
| sra57    | forward | CAAGCAACTGAAGCCGAGAC  | 292  | 170 |
|          | reverse | CCTCAACACCTTCAGCCAAT  |      |     |
| sra58    | forward | CTCGCTCTGACCAAGCATTC  | 234  | 151 |
|          | reverse | GGTGCTTCCCTTCTTGACAC  |      |     |
| sra59    | forward | TTCCGGCAATGAAGGTGT    | 526  | 364 |
|          | reverse | GGTAGACGGGTCTCCGGT    |      |     |
| sra60A   | forward | CCCTTGGTTTTTACGGGTTT  | 944  | 341 |
|          | reverse | AACGGAGTGGCGAATACTTG  |      |     |
| sra60B   | forward | CACGACTCCGATCAACATTC  | 944  | 277 |
|          | reverse | TCCGATCTTCTACGCGAAAC  |      |     |
| sra61    | forward | TTTGGCTTATCCCATTGAGC  | 359  | 207 |
|          | reverse | CATATTGCTCCAGCCACTCA  |      |     |
| sra62A   | forward | CGCGCTCGAACTAAGATTG   | 721  | 337 |
|          | reverse | ACGTGAAAGAGCCCAAAAAG  |      |     |
| sra62B   | forward | ACGTAAGGCGTCAGCTTTGT  | 721  | 321 |
|          | reverse | AAGCCAAACCACAGTCCATC  |      |     |
| sra63A   | forward | AATGCTCTTCACTGCCATCC  | 2018 | 350 |
|          | reverse | GCTTTCACTGCCATCTGCAC  |      |     |
| sra63B   | forward | GCCAAATCGTTTCGGTAACAT | 2018 | 350 |
|          | reverse | GACGTCACCAGCCTGTTCTC  |      |     |
| sra63C   | forward | CGATGCAAGGCTGAAGAAAC  | 2018 | 321 |
|          | reverse | ACCGGTATCCTGCGATATGA  |      |     |
| sra63D   | forward | GAGATCGAAGGCACTCATCC  | 2018 | 329 |
|          | reverse | GACGTCCCTCAAGGCCAGA   |      |     |
| sra64    | forward | CTTGGTTTTGGACCAAGCAT  | 592  | 349 |
|          | reverse | GCGTGGAAGTCAGCCACTAT  |      |     |
| sra65A   | forward | GCTTCACGTGTCACGATTTC  | 964  | 340 |
|          | reverse | GATGTAGTCCGCTTGCCTTG  |      |     |
| sra65B   | forward | TCCGTAAACTGGCAGCAGTA  | 964  | 350 |
|          | reverse | CCAGAGGGCAGGTGAGAATA  |      |     |
| sra66    | forward | TGCACGAAGCCAATGTAGAC  | 728  | 236 |
|          | reverse | CTCCGAGTGTGCAATCTTCA  |      |     |
| sra67    | forward | GCACCGCAAGGTTCAAAA    | 70   | 54  |
|          | reverse | GTTGGGTATCGCCCCATC    |      |     |
| sra67Bis | forward | CCGGTAGCGCTCTAAAACAG  | 135  | 129 |
|          | reverse | GGTTCTTCCCTCCAGACATGC |      |     |
