# Supplementary material for: Identification of chromosomal alpha-proteobacterial small RNAs by comparative genome analysis and detection in Sinorhizobium meliloti strain 1021
Source: PubMed Central journal article supplement (PMC2245857; doi:10.1186/1471-2164-8-467), 2007-12-19
Supplement: 1471-2164-8-467-S11.pdf [file 1471-2164-8-467-S11.pdf]

## Exemple of Artemis Comparison Tool (ACT) results

Syntenic genes are in yellow

### → *ffs*=4.5S

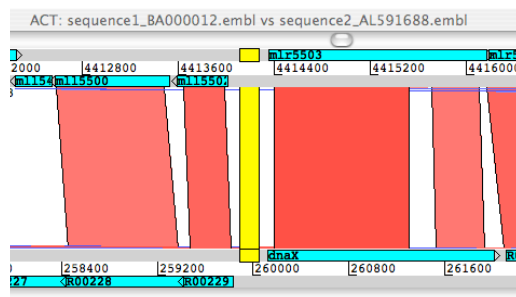

|                         | Left               | Right       |
|-------------------------|--------------------|-------------|
| <i>sra05=ffs=4.5S</i>   | <i>SMc02904</i>    | <i>dnaX</i> |
| <i>R. etli</i>          | <i>RHE_CH00127</i> | <i>dnaX</i> |
| <i>R. leguminosarum</i> | <i>rl0135</i>      | <i>dnaX</i> |
| <i>A.tumefaciens</i>    | <i>AGR_C_148</i>   | <i>dnaX</i> |
| <i>M. loti</i>          | <i>mll5502</i>     | <i>dnaX</i> |

### → *tmRNA*

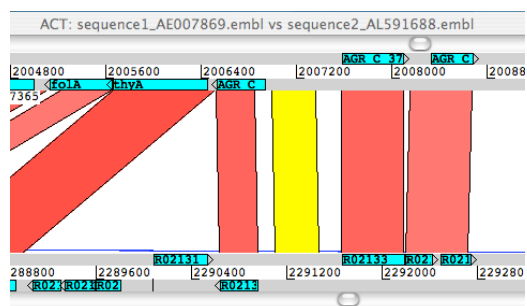

|                      | Left              | Right             |
|----------------------|-------------------|-------------------|
| <i>sra49 = tmRNA</i> | <i>SMc01449</i>   | <i>SMc01450</i>   |
| <i>A.tumefaciens</i> | <i>AGR_C_3711</i> | <i>AGR_C_3712</i> |
| <i>M. loti</i>       | <i>mll1468</i>    | <i>mll1469</i>    |

### → *rnpB*

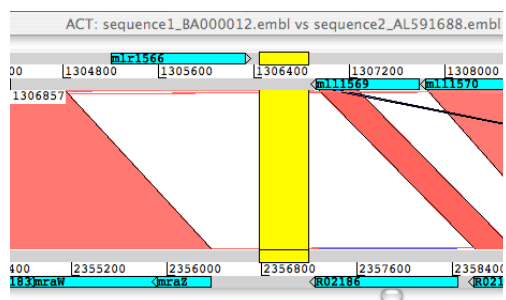

|                         | Left           | Right              |
|-------------------------|----------------|--------------------|
| <i>sra50=tmRNA</i>      | <i>mraZ</i>    | <i>SMc01856</i>    |
| <i>R. etli</i>          | <i>mraZ</i>    | <i>RHE_CH02857</i> |
| <i>R. leguminosarum</i> | <i>mraZ</i>    | <i>RL3317</i>      |
| <i>A.tumefaciens</i>    | <i>mraZ</i>    | <i>AGR_C_3823</i>  |
| <i>M. loti</i>          | <i>mll1566</i> | <i>mll1569</i>     |

### → *sra02*

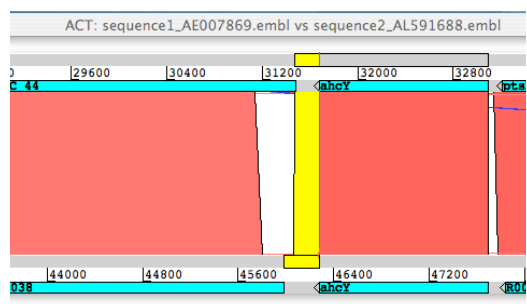

|                         | Left               | Right       |
|-------------------------|--------------------|-------------|
| <i>sra02</i>            | <i>SMc02756</i>    | <i>ahcY</i> |
| <i>R. etli</i>          | <i>RHE_CH00030</i> | <i>ahcY</i> |
| <i>R. leguminosarum</i> | <i>RL0030</i>      | <i>ahcY</i> |
| <i>A.tumefaciens</i>    | <i>AGR_C_44</i>    | <i>ahcY</i> |
| <i>M. loti</i>          | <i>mll5087</i>     | <i>ahcY</i> |

➔ **sra03**

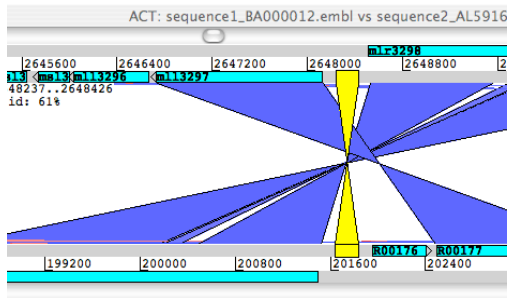

|                         | Left             | Right              |
|-------------------------|------------------|--------------------|
| <i>sra03</i>            | <i>polA</i>      | <i>SMc02851</i>    |
| <i>R. etli</i>          | <i>polA</i>      | <i>RHE_CH00150</i> |
| <i>R. leguminosarum</i> | <i>polA</i>      | <i>R00176</i>      |
| <i>A.tumefaciens</i>    | <i>AGR_C_168</i> | <i>AGR_C_167</i>   |
| <i>M. loti</i>          | <i>polA</i>      | <i>mlr3297</i>     |

➔ **sra04**

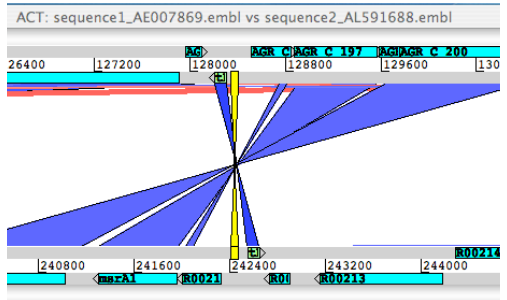

|                      | Left             | Right           |
|----------------------|------------------|-----------------|
| <i>sra04</i>         | <i>smc02886</i>  | <i>tRNA_Ser</i> |
| <i>A.tumefaciens</i> | <i>AGR_C_196</i> | <i>tRNA_Ser</i> |

➔ **sra06**

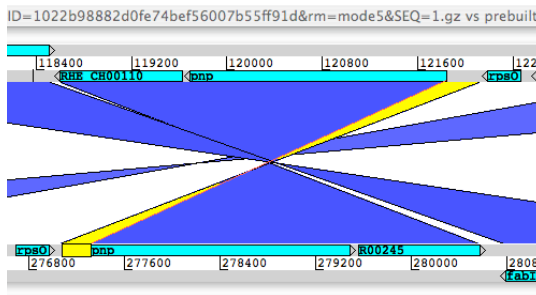

|                         | Left        | Right      |
|-------------------------|-------------|------------|
| <i>sra06</i>            | <i>rpsO</i> | <i>pnp</i> |
| <i>R. etli</i>          | <i>rpsO</i> | <i>pnp</i> |
| <i>R. leguminosarum</i> | <i>rpsO</i> | <i>pnp</i> |
| <i>A.tumefaciens</i>    | <i>rpsO</i> | <i>pnp</i> |
| <i>M. loti</i>          | <i>rpsO</i> | <i>pnp</i> |

➔ **sra09**

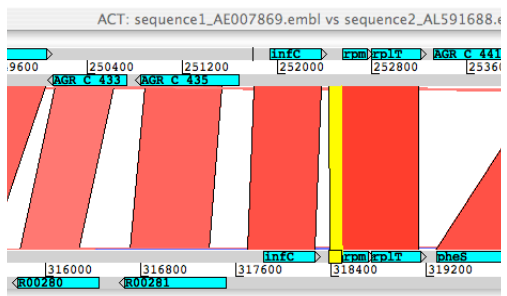

|                         | Left        | Right       |
|-------------------------|-------------|-------------|
| <i>sra09</i>            | <i>infC</i> | <i>rpmE</i> |
| <i>R. etli</i>          | <i>infC</i> | <i>rpmE</i> |
| <i>R. leguminosarum</i> | <i>infC</i> | <i>rpmE</i> |
| <i>A.tumefaciens</i>    | <i>infC</i> | <i>rpmE</i> |

➔ **sra13**

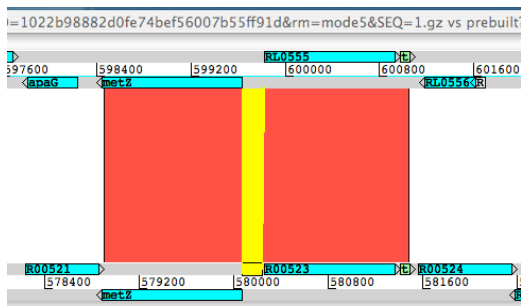

|                         | Left        | Right           |
|-------------------------|-------------|-----------------|
| <i>sra13</i>            | <i>metZ</i> | <i>SMc02218</i> |
| <i>R. etli</i>          | <i>metZ</i> | <i>dcd</i>      |
| <i>R. leguminosarum</i> | <i>metZ</i> | <i>mlr5652</i>  |
| <i>A.tumefaciens</i>    | <i>metZ</i> | <i>dcd</i>      |
| <i>M. loti</i>          | <i>metZ</i> | <i>pnp</i>      |

➔ **sra16**

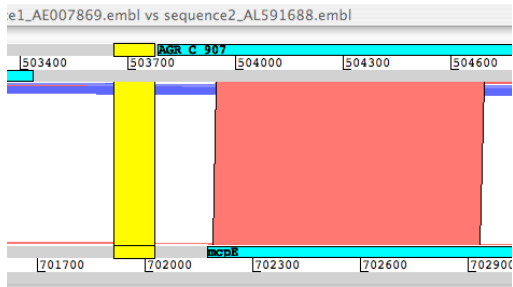

|                      | Left             | Right            |
|----------------------|------------------|------------------|
| <i>sra16</i>         | <i>smc03003</i>  | <i>mcpE</i>      |
| <i>A.tumefaciens</i> | <i>AGR_C_905</i> | <i>AGR_C_907</i> |

➔ **sra19**

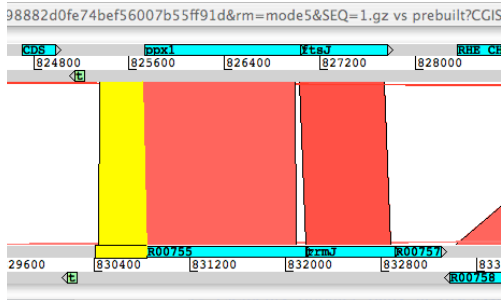

|                      | Left              | Right             |
|----------------------|-------------------|-------------------|
| <i>sra19</i>         | <i>tRNA_Gln</i>   | <i>SMc00810</i>   |
| <i>R. etli</i>       | <i>tRNA_Gln</i>   | <i>ppx1</i>       |
| <i>A.tumefaciens</i> | <i>AGR_C_1096</i> | <i>AGR_C_1098</i> |

➔ **sra20**

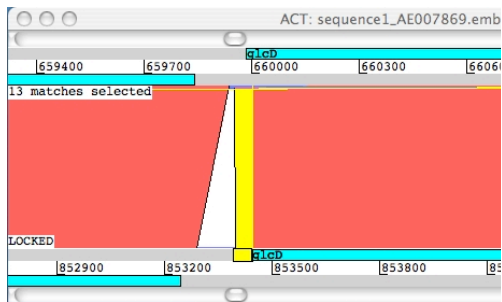

|                         | Left               | Right       |
|-------------------------|--------------------|-------------|
| <i>sra20</i>            | <i>SMc00831</i>    | <i>gldD</i> |
| <i>R. etli</i>          | <i>RHE_CH00807</i> | <i>gldD</i> |
| <i>A.tumefaciens</i>    | <i>AGR_C_1186</i>  | <i>gldD</i> |
| <i>R. leguminosarum</i> | <i>RL0863</i>      | <i>gldD</i> |

➔ **sra22**

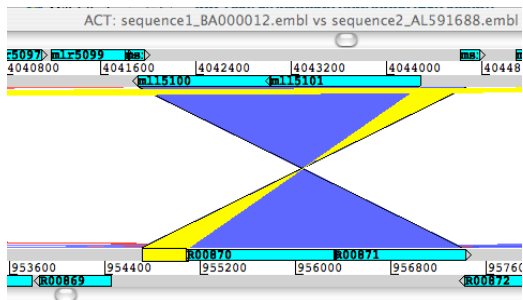

|                | Left            | Right           |
|----------------|-----------------|-----------------|
| <i>sra22</i>   | <i>SMc00981</i> | <i>SMc00982</i> |
| <i>M. loti</i> | <i>msr5103</i>  | <i>mll5101</i>  |

➔ **sra23**

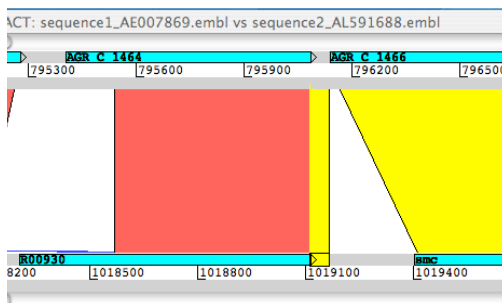

|                      | Left              | Right             |
|----------------------|-------------------|-------------------|
| <i>sra23</i>         | <i>smc00023</i>   | <i>smc</i>        |
| <i>A.tumefaciens</i> | <i>AGR_C_1464</i> | <i>AGR_C_1466</i> |

➔ **sra25**

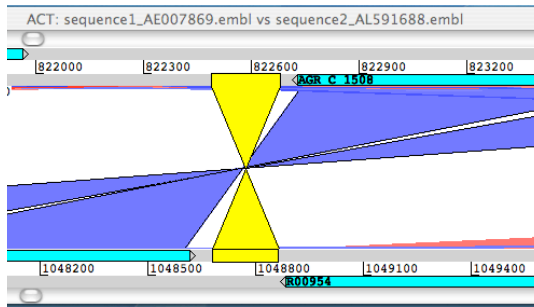

|                      | Left              | Right           |
|----------------------|-------------------|-----------------|
| <i>sra25</i>         | <i>smc00034</i>   | <i>smc00096</i> |
| <i>A.tumefaciens</i> | <i>AGR_C_1508</i> | <i>cysA1</i>    |

➔ **sra26**

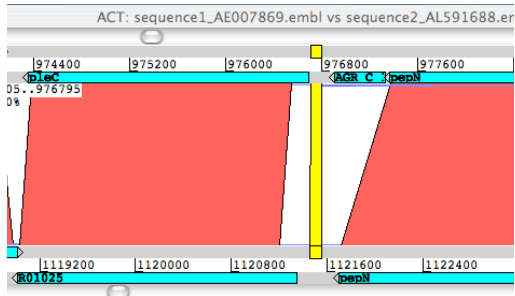

|                         | Left               | Right            |
|-------------------------|--------------------|------------------|
| <i>sra26</i>            | <i>smc02369</i>    | <i>pepN</i>      |
| <i>R. etli</i>          | <i>RHE_CH01297</i> | <i>pepN</i>      |
| <i>R. leguminosarum</i> | <i>RL1445</i>      | <i>pepN</i>      |
| <i>A.tumefaciens</i>    | <i>pleC</i>        | <i>AGR_C_892</i> |

➔ **sra27**

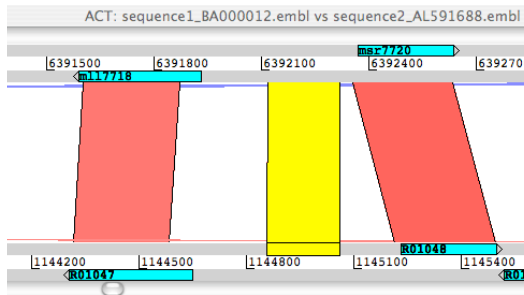

|                      | Left              | Right             |
|----------------------|-------------------|-------------------|
| <i>sra27</i>         | <i>smc02391</i>   | <i>smc02392</i>   |
| <i>A.tumefaciens</i> | <i>AGR_C_1859</i> | <i>AGR_C_1864</i> |
| <i>M. loti</i>       | <i>mlr7718</i>    | <i>msr7720</i>    |

➔ **sra29**

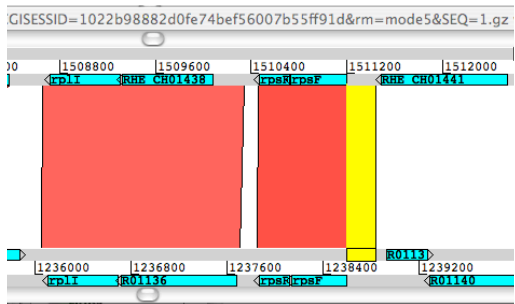

|                         | Left        | Right              |
|-------------------------|-------------|--------------------|
| <i>sra29</i>            | <i>rpsF</i> | <i>smc00569</i>    |
| <i>R. etli</i>          | <i>rpsF</i> | <i>RHE_CH01441</i> |
| <i>R. leguminosarum</i> | <i>rpsF</i> | <i>RL1556</i>      |
| <i>A.tumefaciens</i>    | <i>rpsF</i> | <i>AGR_C_2023</i>  |
| <i>M. loti</i>          | <i>rpsF</i> | <i>mlr7847</i>     |

➔ **sra32**

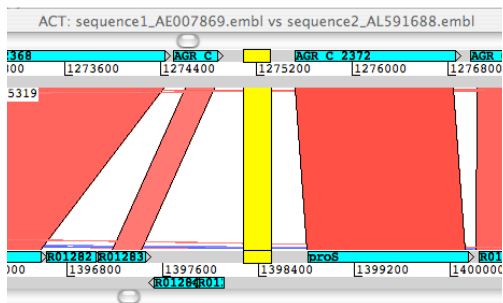

|                         | Left               | Right       |
|-------------------------|--------------------|-------------|
| <i>sra32</i>            | <i>SMc01933</i>    | <i>proS</i> |
| <i>R. etli</i>          | <i>RHE_CH01622</i> | <i>proS</i> |
| <i>R. leguminosarum</i> | <i>RL1718</i>      | <i>proS</i> |
| <i>A.tumefaciens</i>    | <i>AGR_C_2369</i>  | <i>proS</i> |
| <i>M. loti</i>          | <i>rpsF</i>        | <i>proS</i> |

### sra33

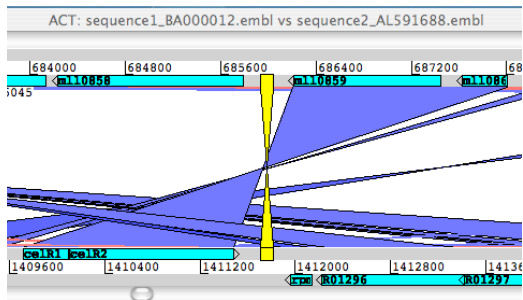

|                         | Left          | Right             |
|-------------------------|---------------|-------------------|
| <i>sra33</i>            | <i>celR2</i>  | <i>rpmG</i>       |
| <i>R. etli</i>          | <i>celR2</i>  | <i>rpmG</i>       |
| <i>R. leguminosarum</i> | <i>RL1730</i> | <i>rpmG</i>       |
| <i>A.tumefaciens</i>    | <i>celR2</i>  | <i>AGR_C_2230</i> |
| <i>M. loti</i>          | <i>celR2</i>  | <i>mll0858</i>    |

### sra35

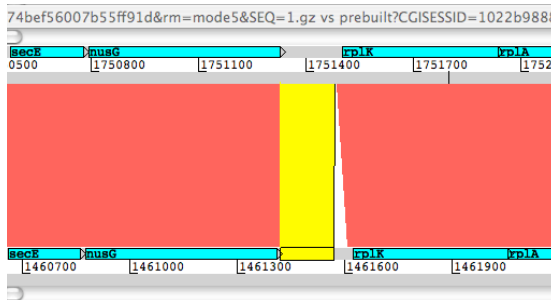

|                         | Left        | Right       |
|-------------------------|-------------|-------------|
| <i>sra35</i>            | <i>nusG</i> | <i>rplK</i> |
| <i>R. etli</i>          | <i>nusG</i> | <i>rplK</i> |
| <i>R. leguminosarum</i> | <i>nusG</i> | <i>rplK</i> |
| <i>A.tumefaciens</i>    | <i>nusG</i> | <i>rplK</i> |
| <i>M. loti</i>          | <i>nusG</i> | <i>rplK</i> |

### sra36

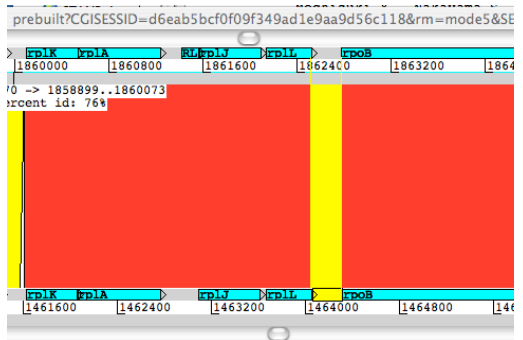

|                         | Left        | Right       |
|-------------------------|-------------|-------------|
| <i>sra36</i>            | <i>rplL</i> | <i>rpoB</i> |
| <i>R. etli</i>          | <i>rplL</i> | <i>rpoB</i> |
| <i>R. leguminosarum</i> | <i>rplL</i> | <i>rpoB</i> |
| <i>A.tumefaciens</i>    | <i>rplL</i> | <i>rpoB</i> |

### sra39

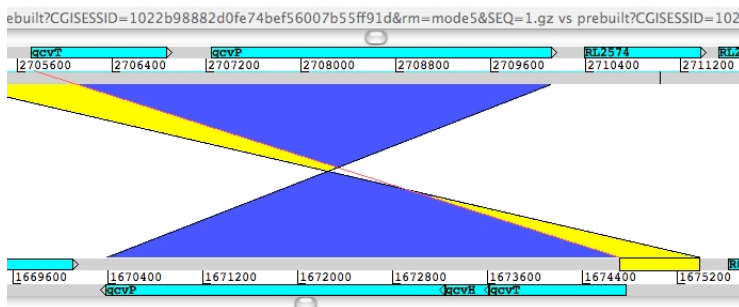

|                         | Left               | Right       |
|-------------------------|--------------------|-------------|
| <i>sra39</i>            | <i>SMc01242</i>    | <i>gcvT</i> |
| <i>R. etli</i>          | <i>RHE_CH02240</i> | <i>gcvT</i> |
| <i>R. leguminosarum</i> | <i>RL2571</i>      | <i>gcvT</i> |
| <i>A.tumefaciens</i>    | <i>AGR_C_2705</i>  | <i>gcvT</i> |
| <i>M. loti</i>          | <i>mll0880</i>     | <i>gcvT</i> |

### sra41

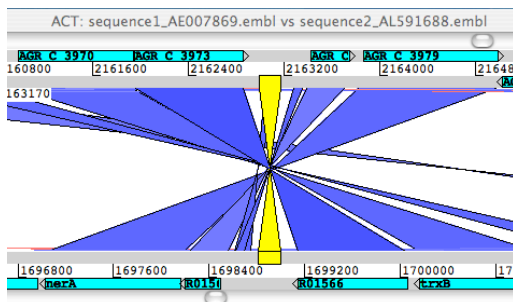

➔ **sra45**

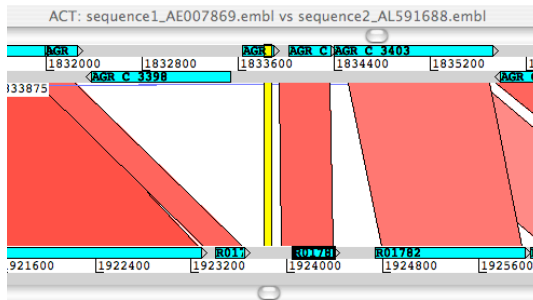

|                         | Left               | Right           |
|-------------------------|--------------------|-----------------|
| <i>sra45</i>            | <i>SMc00487</i>    | <i>SMc00538</i> |
| <i>R. etli</i>          | <i>RHE_CH02303</i> |                 |
| <i>R. leguminosarum</i> | <i>RL2613</i>      | <i>RL2614</i>   |
| <i>A.tumefaciens</i>    | <i>AGR_C_3399</i>  |                 |

➔ **sra46**

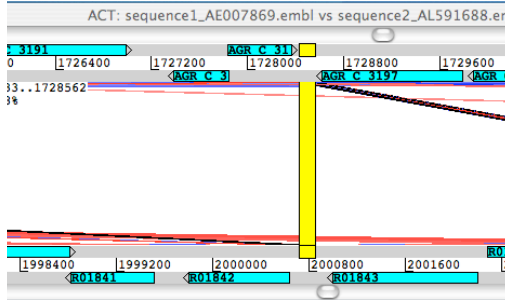

|                         | Left               | Right             |
|-------------------------|--------------------|-------------------|
| <i>sra46</i>            | <i>SMc00165</i>    | <i>SMc00164</i>   |
| <i>R. etli</i>          | <i>RHE_CH02368</i> | <i>aroG</i>       |
| <i>R. leguminosarum</i> | <i>RL2681</i>      | <i>RL2682</i>     |
| <i>A.tumefaciens</i>    | <i>AGR_C_3195</i>  | <i>AGR_C_3197</i> |

➔ **sra51**

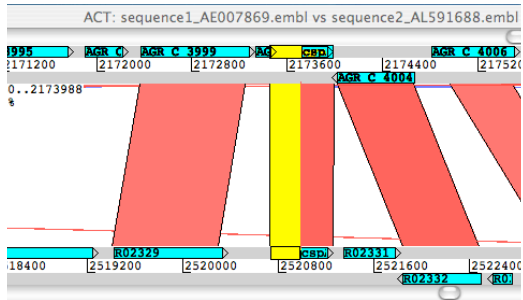

|                         | Left               | Right        |
|-------------------------|--------------------|--------------|
| <i>sra51</i>            | <i>SMc01584</i>    | <i>cspA3</i> |
| <i>R. etli</i>          | <i>RHE_CH03004</i> | <i>cspA5</i> |
| <i>R. leguminosarum</i> | <i>RL3448</i>      | <i>cspA</i>  |
| <i>A.tumefaciens</i>    | <i>AGR_C_4001p</i> | <i>cspA</i>  |

➔ **sra54**

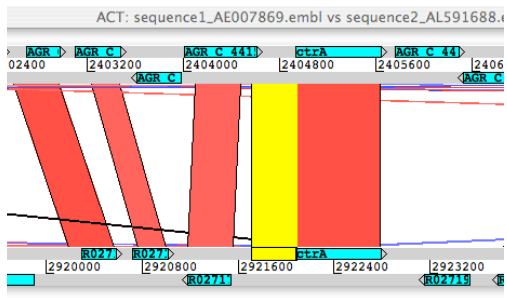

|                      | Left               | Right       |
|----------------------|--------------------|-------------|
| <i>sra54</i>         | <i>SMc00655</i>    | <i>ctrA</i> |
| <i>R. etli</i>       | <i>RHE_CH03333</i> | <i>ctrA</i> |
| <i>A.tumefaciens</i> | <i>AGR_C_4415</i>  | <i>ctrA</i> |

➔ **sra55**

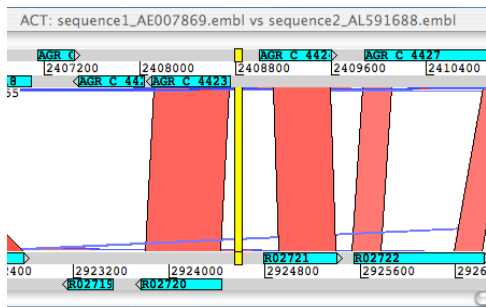

|                      | Left              | Right             |
|----------------------|-------------------|-------------------|
| <i>sra55</i>         | <i>SMc00652</i>   | <i>SMc00651</i>   |
| <i>A.tumefaciens</i> | <i>AGR_C_4423</i> | <i>AGR_C_4424</i> |

➔ **sra56**

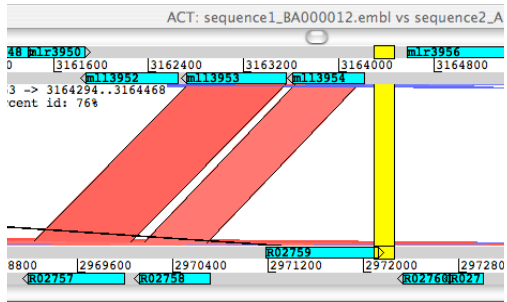

|                         | Left                        | Right              |
|-------------------------|-----------------------------|--------------------|
| <i>sra56</i>            | <i>smc00530</i>             | <i>nifS</i>        |
| <i>R. etli</i>          | <i>RHE_CH03492</i>          | <i>RHE_CH03493</i> |
| <i>R. leguminosarum</i> | <i>RL4003</i>               | <i>RL4004</i>      |
| <i>A.tumefaciens</i>    | <i>Linear Chom. Atu3734</i> |                    |
| <i>M. loti</i>          | <i>mlr4028</i>              | <i>mll4029</i>     |

➔ **sra58**

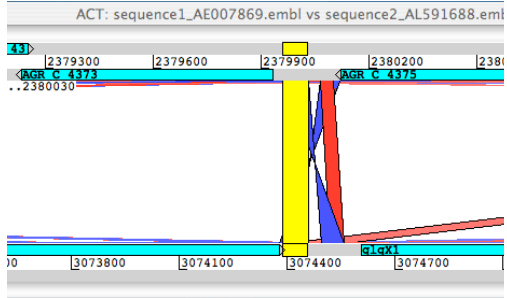

|                         | Left               | Right              |
|-------------------------|--------------------|--------------------|
| <i>sra51</i>            | <i>pgm</i>         | <i>glx1</i>        |
| <i>R. etli</i>          | <i>RHE_CH01194</i> | <i>RHE_CH01195</i> |
| <i>R. leguminosarum</i> | <i>RL3112A</i>     |                    |
