# Supplementary material for: Identification of chromosomal alpha-proteobacterial small RNAs by comparative genome analysis and detection in Sinorhizobium meliloti strain 1021
Source: PubMed Central journal article supplement (PMC2245857; doi:10.1186/1471-2164-8-467), 2007-12-19
Supplement: 1471-2164-8-467-S12.pdf [file 1471-2164-8-467-S12.pdf]

## Proposed alignment from TargetRNA analysis of *sra* genes interactions ( $e < 10^{-3}$ )

### ⇒ *sra32* targets

#### 1- *fliM* : Flagellar motor switch transmembrane protein

Score: -84 Pvalue: 0.000199501

|                      |    |                                  |     |
|----------------------|----|----------------------------------|-----|
| sRNA                 | 60 | AUCUUAGGCGCGC-UUG--UUCGCUGCCGCCG | 88  |
|                      |    | :                                |     |
| mRNA ( <i>fliM</i> ) | 2  | UACAGUCCG-GCGGAACGAAAGCGACGGCGGC | -29 |

#### 2- *SMc01800* = transmembrane cytochrome C oxidase

Score: -83 Pvalue: 0.000237386

|                          |    |                              |     |
|--------------------------|----|------------------------------|-----|
| sRNA                     | 69 | GCGCUUGUUCG-CUGCCGCCGGAACGG  | 95  |
|                          |    | :     :    :                 |     |
| mRNA ( <i>SMc01800</i> ) | -2 | CGUGAAGGAGUAGACAGCGGCCUUUGCC | -29 |

### ⇒ *sra33* targets

#### 1- *SMc00899* = hypothetical protein

Score: -78 Pvalue: 0.000301856

|                          |    |                                                  |     |
|--------------------------|----|--------------------------------------------------|-----|
| sRNA                     | 2  | CCAUGAUGCUCAGGUCCGCCGCAU-CU-CCUGGGUCGUGGGGUCGGUC | 47  |
|                          |    | :    :                       :                   |     |
| mRNA ( <i>SMc00899</i> ) | 19 | GGAACUACGAGUCGCGGUAGUCUACGAAGGACCAAGGAC---AGCUAG | -26 |

#### 2- *rkpJ* = capsular polysaccharide biosynthesis/export protein

Score: -73 Pvalue: 0.000749566

|                      |    |                                    |     |
|----------------------|----|------------------------------------|-----|
| sRNA                 | 40 | GGUCG-GUCGGCUGGCCUCGGACUUGCGGAUUC  | 72  |
|                      |    | :                                  |     |
| mRNA ( <i>rkpJ</i> ) | 18 | CCAGCAUAGACGACAGUAGCC----CGCCUAAGG | -12 |

### ⇒ *sra41* copie 1 target

#### 1- *SMc02392* = hypothetical protein

Score: -75 Pvalue: 0.00097857

|                          |    |                                       |     |
|--------------------------|----|---------------------------------------|-----|
| sRNA                     | 84 | AAGGGC-CCAAGUUUUUCUUGGGCCCU--CUUUUUUU | 118 |
|                          |    | :                               :     |     |
| mRNA ( <i>SMc02392</i> ) | 11 | UUCUCACGGU--AAAAGAACA--GGGACAGAAAAGAA | -23 |

### ⇒ *sra41* copie 2 target

#### 1- *SMc00317* = hypothetical protein

##### 1 *SMc00317* hypothetical protein

Score: -80 Pvalue: 0.000214469

|                          |    |                            |     |
|--------------------------|----|----------------------------|-----|
| sRNA                     | 23 | CUCCCCAGCCGUGCAGCAGCUGUUC  | 49  |
|                          |    |                            |     |
| mRNA ( <i>SMc00317</i> ) | -4 | GAGGGAGCGCGACGUCUUCGCGAAGG | -30 |

#### 1- *SMc01118* = hypothetical protein

##### 2 *SMc01118* hypothetical protein

Score: -76 Pvalue: 0.000443528

|                          |   |                                  |     |
|--------------------------|---|----------------------------------|-----|
| sRNA                     | 5 | GCAUCU-AGCGGCUUUCUCCUCCCCAGCCGUC | 37  |
|                          |   |                                  |     |
| mRNA ( <i>SMc01118</i> ) | 4 | CGUAAAGUCGGCGCCAGAGGGGACGCGGACG  | -30 |
