# Supplementary material for: Identification of chromosomal alpha-proteobacterial small RNAs by comparative genome analysis and detection in Sinorhizobium meliloti strain 1021
Source: PubMed Central journal article supplement (PMC2245857; doi:10.1186/1471-2164-8-467), 2007-12-19
Supplement: 1471-2164-8-467-S13.pdf [file 1471-2164-8-467-S13.pdf]

**Predicted structure of alpha-proteobacteria conserved *sra* genes**

*sra05* = *ffs*

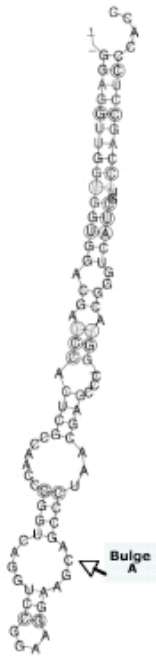

*Alifod prediction*

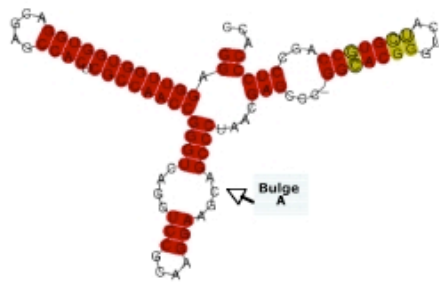

*RNAz prediction*

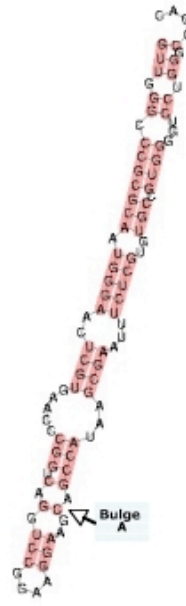

*RFAM*

*sra56* = *6S*

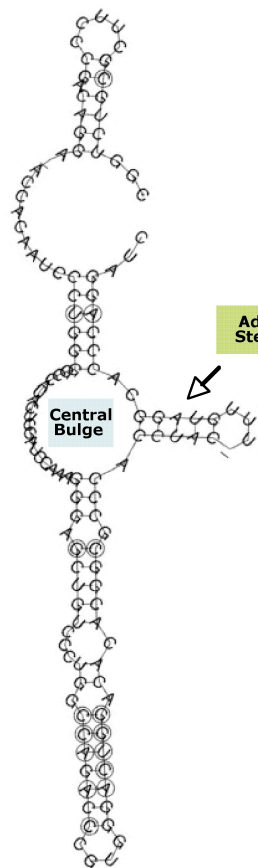

*Alifod prediction*

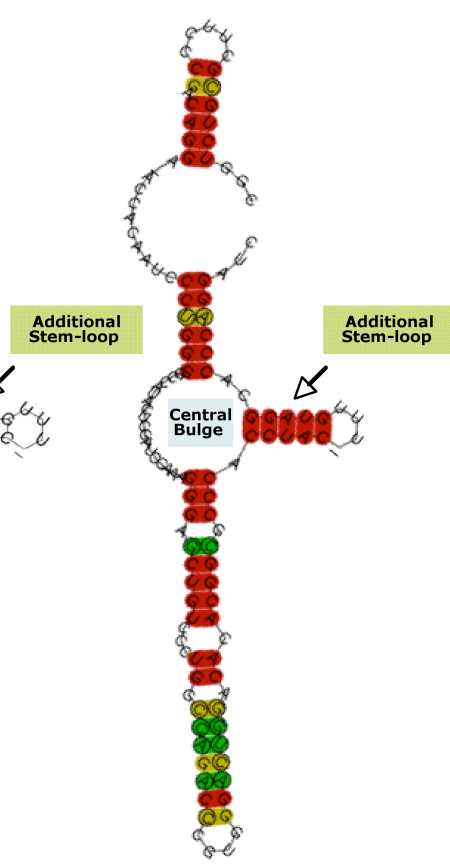

*RNAz prediction*

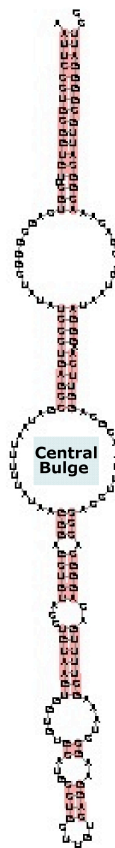

*RFAM*

sra03

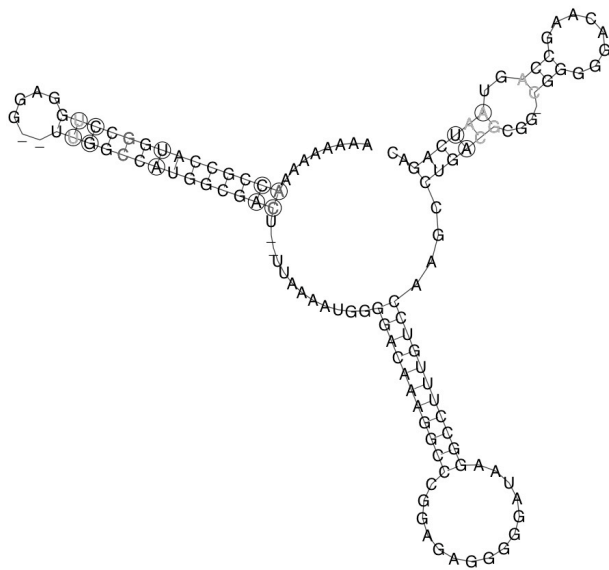

*Alifod prediction*

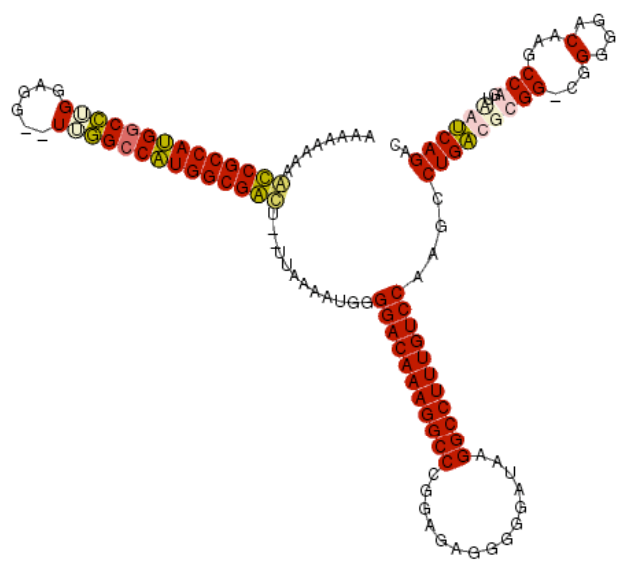

*RNAz prediction*

sra25

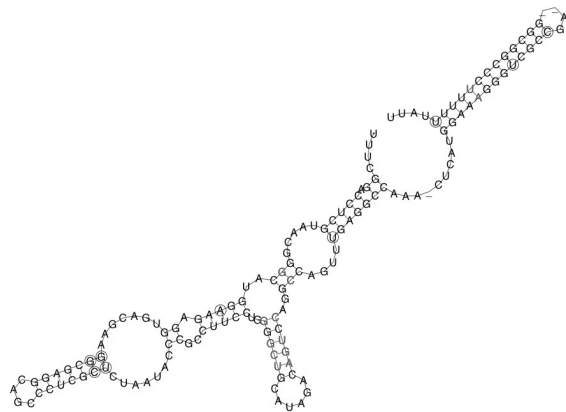

*Alifod prediction*

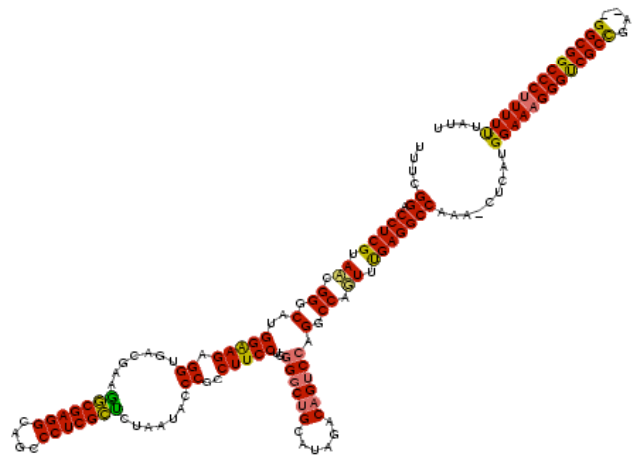

*RNAz prediction*

sra33

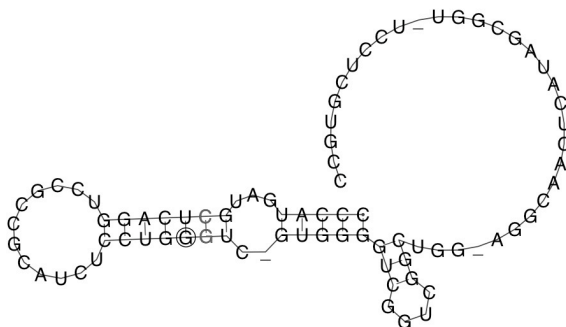

*Alifod prediction*

*No RNAz prediction ( $P > 0.5$ )*

*sra41*

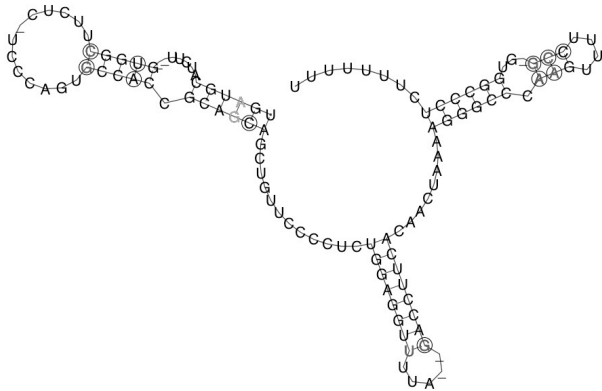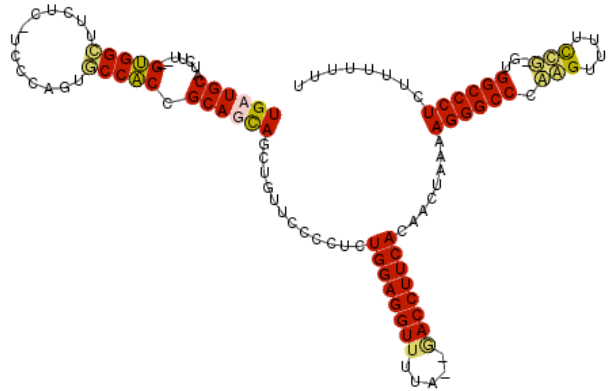

*Alifod prediction*

*RNAz prediction*

*sra32*

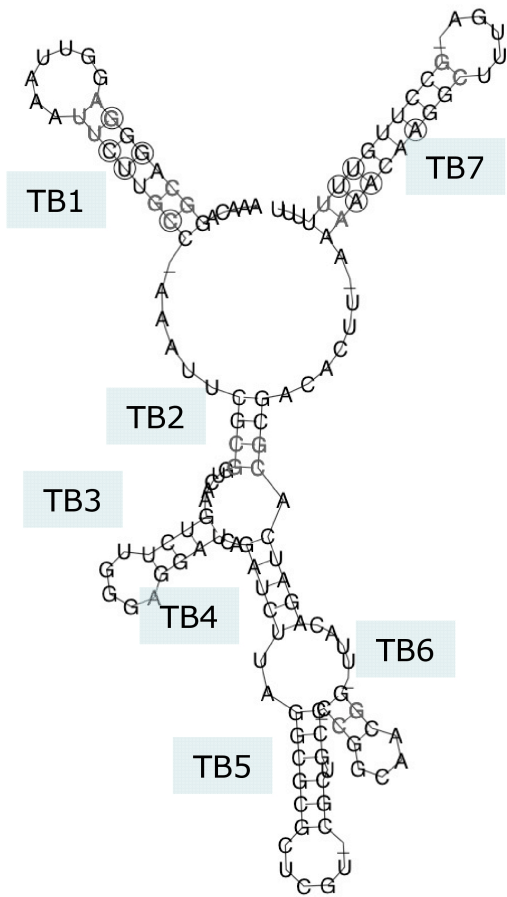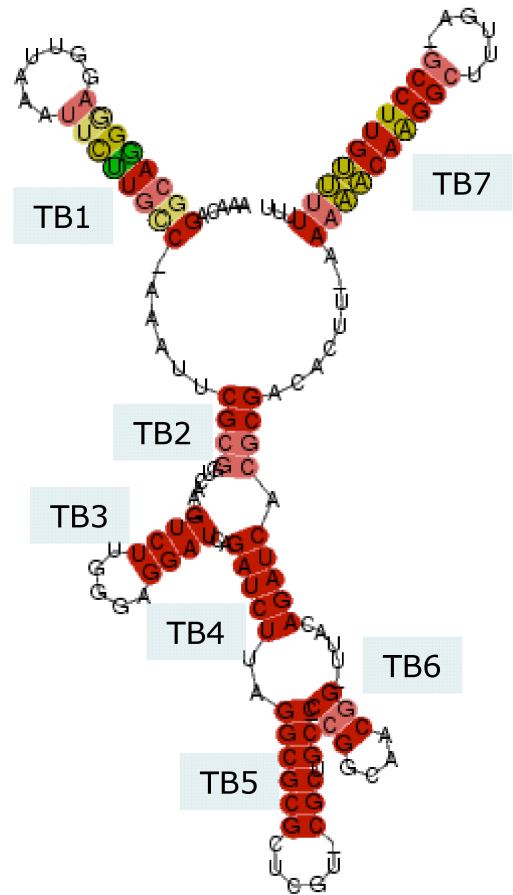

*Alifod prediction*

*RNAz prediction*
